# Supplementary material for: Balancing enthalpy and entropy in inhibitor binding to the prostate-specific membrane antigen (PSMA)
Source: Royal Society of Chemistry journal article supplement (doi:10.1039/d4cp04137b), 2024-12-23
Supplement: d4cp04137b1.pdf [file d4cp04137b1.pdf]

## Supporting Information for

### **Balancing Enthalpy and Entropy Changes in Inhibitors binding to the Prostate-Specific Membrane Antigen (PSMA)**

Yuqing Xiong <sup>a</sup>, Xinlin Wang <sup>b</sup>, Mengchao Cui <sup>a, b, \*</sup>, Yajun Liu <sup>a, \*</sup>, Beibei Wang <sup>a, \*</sup>

<sup>a</sup> Center for Advanced Materials Research, Beijing Normal University at Zhuhai, Zhuhai 519087, China;

<sup>b</sup> Key Laboratory of Radiopharmaceuticals, Ministry of Education, Beijing Normal University, Beijing 100875, China.

\* Corresponding authors: Mengchao Cui: [cmc@bnu.edu.cn](mailto:cmc@bnu.edu.cn); Yajun Liu: [yajun.liu@bnu.edu.cn](mailto:yajun.liu@bnu.edu.cn); Beibei Wang: [bbwang@bnu.edu.cn](mailto:bbwang@bnu.edu.cn).

## Supplementary Methods and Materials

### Synthesis

*Synthesis of Compound 2.* To the suspension of **1** (1.00 g, 7.24 mmol) in acetonitrile (30 mL) was added *N,N*-Diisopropylethylamine (3.0 mL). The reaction mixture was stirred at room temperature under SO<sub>2</sub>F<sub>2</sub> for 12 h. The solvent was removed by evaporation in vacuum. The residue was added to 15 mL of ethyl acetate and ultrasonically vibrated for 5 min. The solid was collected by filtration and washed with ethyl acetate to give **2** as a white solid, which was used for the next step without further purification.

*Synthesis of Compound 3.* Crude compound **2** (1.54 g, ~6.99 mmol) was suspended in CH<sub>2</sub>Cl<sub>2</sub> (30 mL), and the 2,3,5,6-tetrafluorophenol (1.39 g, 8.37 mmol), *N,N*-Dicyclohexylcarbodiimide (1.44 g, 6.99 mmol) was added. The reaction mixture was stirred at room temperature for 4 h. The solvent was removed by evaporation in vacuum, and the residue was purified by silica gel column chromatography to give **3** as a white solid (1.88 g, ~73%). <sup>1</sup>H NMR (600 MHz, CDCl<sub>3</sub>) δ 8.29 (m, 1H), 8.18 (s, 1H), 7.71 - 7.70 (m, 2H), 7.09 (m, 1H). <sup>19</sup>F NMR (565 MHz, CDCl<sub>3</sub>) δ 38.74, 138.31, 152.43.

*Synthesis of Compound 4.* Compound **3** (814 mg, 2.21 mmol), di-*tert*-butyl (((*S*)-6-amino-1-(*tert*-butoxy)-1-oxohexan-2-yl)carbamoyl)-*L*-glutamate (1.29 g, 2.65 mmol), and triethylamine (650 μL) was dissolved in CH<sub>2</sub>Cl<sub>2</sub>. The reaction mixture was stirred at room temperature for 3 h. The solvent was removed by evaporation in vacuum, and the residue was purified by silica gel column chromatography to give **4** as a white solid (1.20 g, 80%). <sup>1</sup>H NMR (400 MHz, DMSO-*d*<sub>6</sub>) δ 8.67 (t, *J* = 5.4 Hz, 1H), 7.98 (d, *J* = 8.5 Hz, 1H), 7.97 (s, 1H), 7.75 (d, *J* = 8.7 Hz, 1H), 7.69 (t, *J* = 7.9 Hz, 1H), 6.28 (t, *J* = 7.8 Hz, 2H), 4.04 - 3.97 (m, 2H), 3.30 - 3.25 (m, 2H), 2.24 - 2.17 (m, 2H), 1.90 - 1.82 (m, 1H), 1.70 - 1.61 (s, 2H), 1.57 - 1.50 (m, 3H), 1.41 - 1.39 (m, 2H), 1.38 - 1.37 (m, 18H), 1.35 (s, 9H). <sup>19</sup>F NMR (565 MHz, DMSO-*d*<sub>6</sub>) δ 39.16.

*Synthesis of Compound M01.* Compound **4** (1.14 g, 1.65 mmol) was dissolved in 9 mL CH<sub>2</sub>Cl<sub>2</sub>, and 9 mL trifluoroacetic acid was added. The reaction mixture was stirred at room temperature for 4 h. Then, the solvent was evaporated under vacuum, and ethyl acetate (10 mL) was added. The precipitate was isolated by centrifugation, washed with ethyl acetate and petroleum ether three times, and finally dried to give the final product as white solid (793 mg, 92%). <sup>1</sup>H NMR (400 MHz,

DMSO- $d_6$ )  $\delta$  12.41 (brs, 3H), 8.68 (s, 1H), 7.98 (s, 2H), 7.77 (d,  $J = 7.1$  Hz, 1H), 7.69 (t,  $J = 7.1$  Hz, 1H), 6.31 (s, 2H), 4.08 (m, 2H), 3.26 (m, 2H), 2.24 (m, 2H), 1.91 (m, 1H), 1.70 (m, 2H), 1.54 (s, 3H), 1.34 (m, 2H).  $^{19}\text{F}$  NMR (376 MHz, DMSO- $d_6$ )  $\delta$  39.02. HRMS:  $m/z$  calculated for  $[\text{C}_{19}\text{H}_{24}\text{O}_{11}\text{N}_3\text{FNaS}]^+$  544.1008; found 544.1009.

*Synthesis of Compound 5.* Following the synthesis procedure of compound **4** using the corresponding amino compound, di-*tert*-butyl (((*S*)-6-amino-1-(*tert*-butoxy)-1-oxohexan-2-yl)carbamoyl)-*D*-glutamate. The final compound **5** was obtained as a white solid (300 mg, 83%).  $^1\text{H}$  NMR (400 MHz,  $\text{CDCl}_3$ )  $\delta$  7.95 – 7.86 (m, 2H), 7.55 (t,  $J = 8.0$  Hz, 1H), 7.46 (dd,  $J = 8.2, 2.5$  Hz, 1H), 7.05 (t,  $J = 5.4$  Hz, 1H), 5.51 – 5.20 (m, 2H), 4.32 (dd,  $J = 8.5, 4.3$  Hz, 1H), 4.25 (dd,  $J = 8.0, 5.2$  Hz, 1H), 3.55 – 3.36 (m, 2H), 2.28 – 2.12 (m, 2H), 2.01 – 1.93 (m, 1H), 1.87 – 1.77 (m, 2H), 1.73 – 1.59 (m, 3H), 1.52 – 1.42 (m, 20H), 1.42 (s, 9H).  $^{19}\text{F}$  NMR (376 MHz, Chloroform- $d$ )  $\delta$  38.33.

*Synthesis of Compound M02.* Following the synthesis procedure of compound **M01**. The final compound **M02** was obtained as a white solid (210 mg, 90%).  $^1\text{H}$  NMR (600 MHz, DMSO- $d_6$ )  $\delta$  12.44 (s, 3H), 8.68 (t,  $J = 5.7$  Hz, 1H), 8.02 – 7.94 (m, 2H), 7.77 (d,  $J = 8.3$  Hz, 1H), 7.70 (t,  $J = 8.1$  Hz, 1H), 6.37 (dd,  $J = 8.3, 3.7$  Hz, 2H), 4.14 – 4.04 (m, 2H), 3.26 (q,  $J = 6.8$  Hz, 2H), 2.27 – 2.15 (m, 2H), 1.94 – 1.85 (m, 1H), 1.75 – 1.63 (m, 2H), 1.59 – 1.48 (m, 3H), 1.37 – 1.27 (m, 2H).  $^{19}\text{F}$  NMR (565 MHz, DMSO- $d_6$ )  $\delta$  39.17.

*Synthesis of Compound 7.* To the suspension of **6** (2.00 g, 10.98 mmol) in acetonitrile (50 mL) was added *N,N*-Diisopropylethylamine (8.0 mL). The reaction mixture was stirred at room temperature under  $\text{SO}_2\text{F}_2$  for 12 h. The solvent was removed by evaporation in vacuum. The residue was added to 30 mL of ethyl acetate and ultrasonically vibrated for 5 min. The mixture was filtrated and the solution was washed by 10 mL  $\text{H}_2\text{O}$  twice. The organic layers were dried over  $\text{MgSO}_4$  and concentrated under vacuum to give **7** as a brown oil, which was used for the next step without further purification.

*Synthesis of Compound 8.* Following the synthesis procedure of compound **3**. The final compound **8** was obtained as a white solid (1.0 g, ~56%).  $^1\text{H}$  NMR (600 MHz,  $\text{CDCl}_3$ )  $\delta$  9.08 (d,  $J = 0.9$  Hz, 1H), 8.49 (s, 2H), 7.18 - 7.05 (m, 2H).  $^{19}\text{F}$  NMR (565 MHz,  $\text{CDCl}_3$ )  $\delta$  39.77, 137.81, 152.15.

*Synthesis of Compound 9.* Following the synthesis procedure of compound **4**. The final compound **9** was obtained as a white solid (680 mg, 75%). <sup>1</sup>H NMR (400 MHz, CDCl<sub>3</sub>) δ 8.54 (s, 1H), 8.12 (s, 2H), 7.85 (s, 2H), 5.87 (brs, 4H), 4.30 (dd, J = 8.2, 3.9 Hz, 2H), 4.18 (dd, J = 8.2, 5.1 Hz, 2H), 3.46 (s, 2H), 3.45 (s, 2H), 2.31 - 2.26 (m, 4H), 2.01 - 1.96 (m, 2H), 1.88 - 1.77 (m, 4H), 1.66 - 1.59 (m, 6H), 1.50 - 1.44 (m, 4H), 1.42 (s, 36H), 1.37 (s, 18H). <sup>19</sup>F NMR (565 MHz, CDCl<sub>3</sub>) δ 39.06.

*Synthesis of Compound D01.* Following the synthesis procedure of compound **M01**. The final compound **D01** was obtained as a white solid (593 mg, 90%). <sup>1</sup>H NMR (600 MHz, DMSO-*d*<sub>6</sub>) δ 12.39 (brs, 6H), 8.78 (t, J = 4.9 Hz, 2H), 8.45 (s, 1H), 8.13 (s, 2H), 6.31 (t, J = 8.3 Hz, 4H), 4.08 (m, 4H), 3.28 (m, 2H), 3.27 (m, 2H), 2.29 - 2.19 (m, 4H), 1.94 - 1.89 (m, 2H), 1.74 - 1.66 (m, 4H), 1.58 - 1.54 (m, 6H), 1.39 - 1.34 (m, 4H). <sup>19</sup>F NMR (565 MHz, DMSO-*d*<sub>6</sub>) δ 39.83. HRMS: m/z calculated for [C<sub>32</sub>H<sub>43</sub>O<sub>19</sub>N<sub>6</sub>FN<sub>3</sub>S]<sup>+</sup> 889.2180; found 889.2180.

*Synthesis of Compound 10.* Following the synthesis procedure of compound **5**. The final compound **10** was obtained as a white solid (600 mg, 83%). <sup>1</sup>H NMR (600 MHz, CDCl<sub>3</sub>) δ 8.34 (s, 1H), 8.04 (s, 2H), 7.91 - 7.81 (m, 2H), 6.04 - 5.79 (m, 4H), 4.33 - 4.22 (m, 2H), 4.19 - 4.14 (m, 2H), 3.46 - 3.37 (m, 4H), 2.22 - 2.15 (m, 4H), 1.97 - 1.89 (m, 2H), 1.81 - 1.74 (m, 4H), 1.67 - 1.60 (m, 6H), 1.43 - 1.38 (m, 56H). <sup>19</sup>F NMR (565 MHz, CDCl<sub>3</sub>) δ 39.05.

*Synthesis of Compound D02.* Following the synthesis procedure of compound **M01**. The final compound **D02** was obtained as a white solid (450 mg, 86%). <sup>1</sup>H NMR (600 MHz, DMSO-*d*<sub>6</sub>) δ 12.65 - 12.26 (m, 5H), 8.79 (t, J = 5.5 Hz, 2H), 8.45 (s, 1H), 8.13 (s, 2H), 6.37 (d, J = 8.2 Hz, 4H), 4.10 (dq, J = 14.4, 7.4 Hz, 4H), 3.28 - 3.25 (m, 4H), 2.27 - 2.15 (m, 4H), 1.92 - 1.85 (m, 2H), 1.74 - 1.64 (m, 4H), 1.59 - 1.52 (m, 6H), 1.36 - 1.29 (m, 4H). <sup>19</sup>F NMR (565 MHz, DMSO-*d*<sub>6</sub>) δ 39.85.

### **In Vitro Inhibition Assay**

PSMA inhibitory activity was determined using a modification of the N-acetylated- $\alpha$ -linked acidic dipeptidase (NAALADase) assay. Briefly, recombinant human PSMA protein (human PSMA/FOLH1 protein, 0.44  $\mu$ g/mL, 50  $\mu$ L) was incubated with the inhibitor ( $4 \times 10^{-11}$  to  $4 \times 10^{-4}$  M, 25  $\mu$ L) in the presence of 160  $\mu$ M N-acetylaspartylglutamate (NAAG) (25  $\mu$ L) in HEPES buffer at 37 °C for 60 min. Glutamate released by NAAG hydrolysis was measured by incubating with an

OPA (ortho-phthaldialdehyde) working solution for 3 min, avoiding light. Fluorescence was measured by a plate reader with excitation at 350 nm and emission at 450 nm. Semilog plots reflected the inhibition curve, and IC<sub>50</sub> values were determined at the concentration where enzyme activity was inhibited by 50%. Enzyme inhibitory constants (K<sub>i</sub> values) were generated through Cheng–Prusoff conversion (GraphPad Prism 8.3.0). Assays were performed in triplicate.

### Supplementary characterization: NMR and MS Spectra of Compounds.

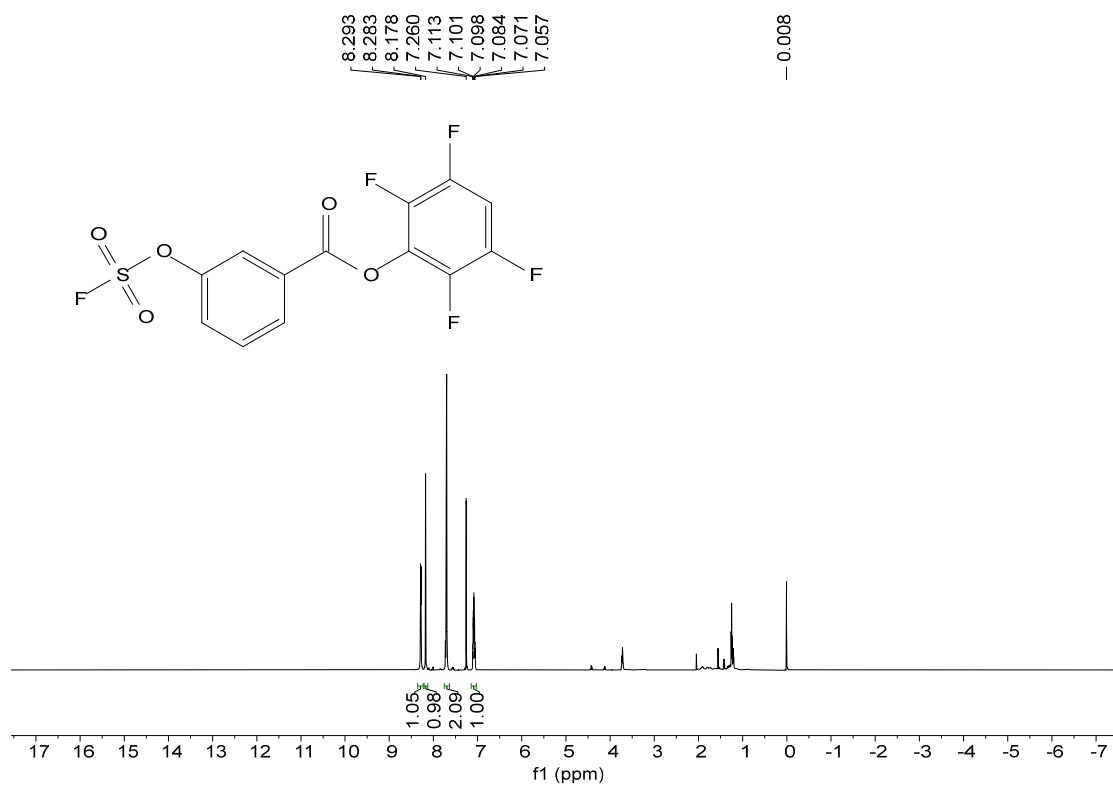

<sup>1</sup>H -NMR spectrum of compound **3** in CDCl<sub>3</sub>.

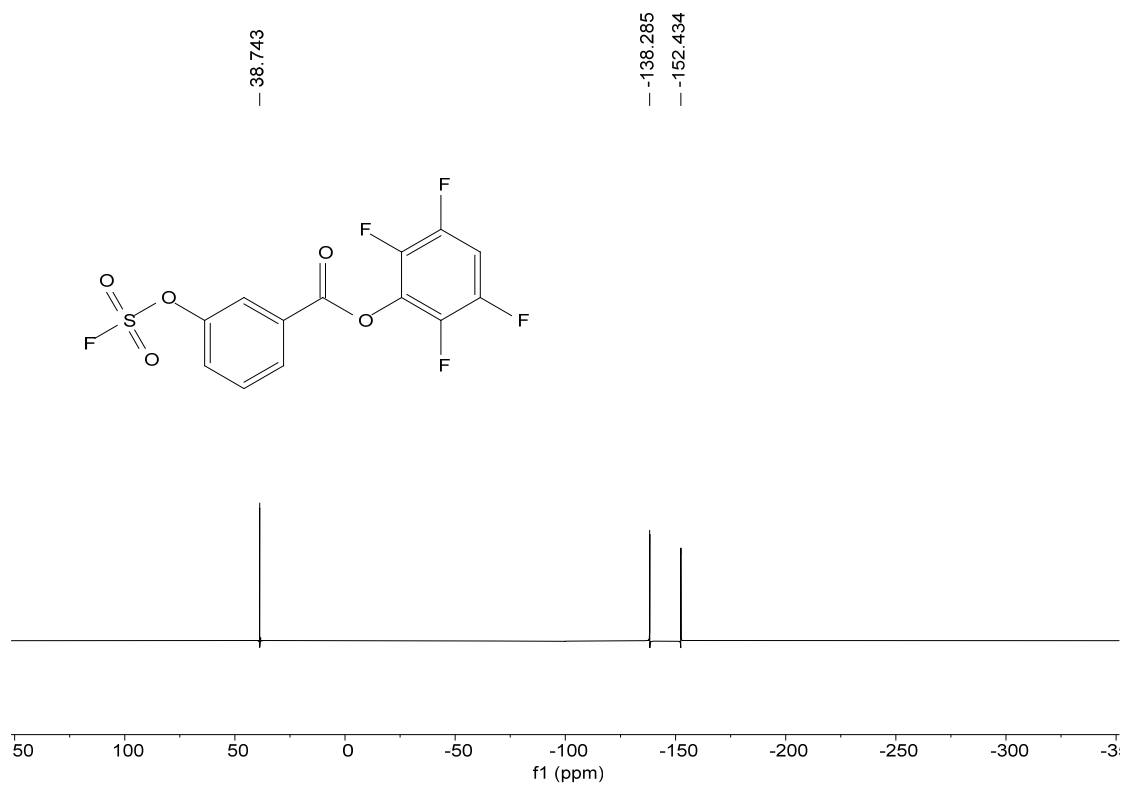

<sup>19</sup>F -NMR spectrum of compound **3** in CDCl<sub>3</sub>.

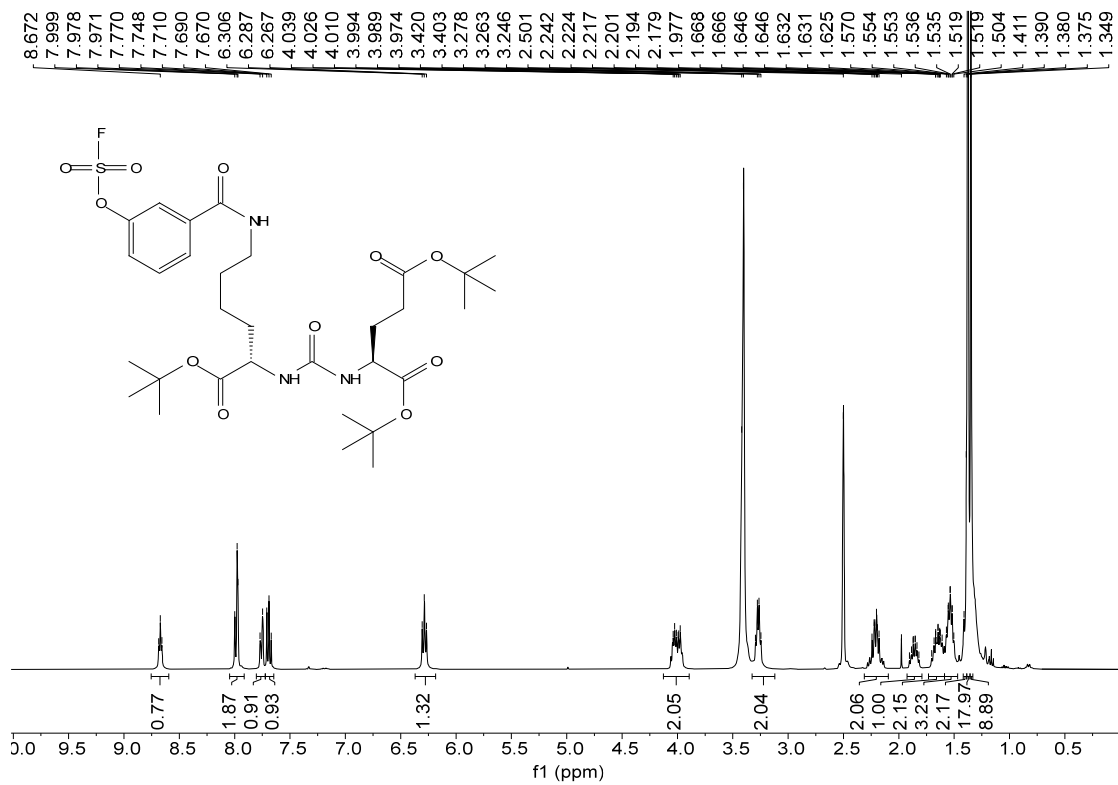

<sup>1</sup>H -NMR spectrum of compound 4 in DMSO.

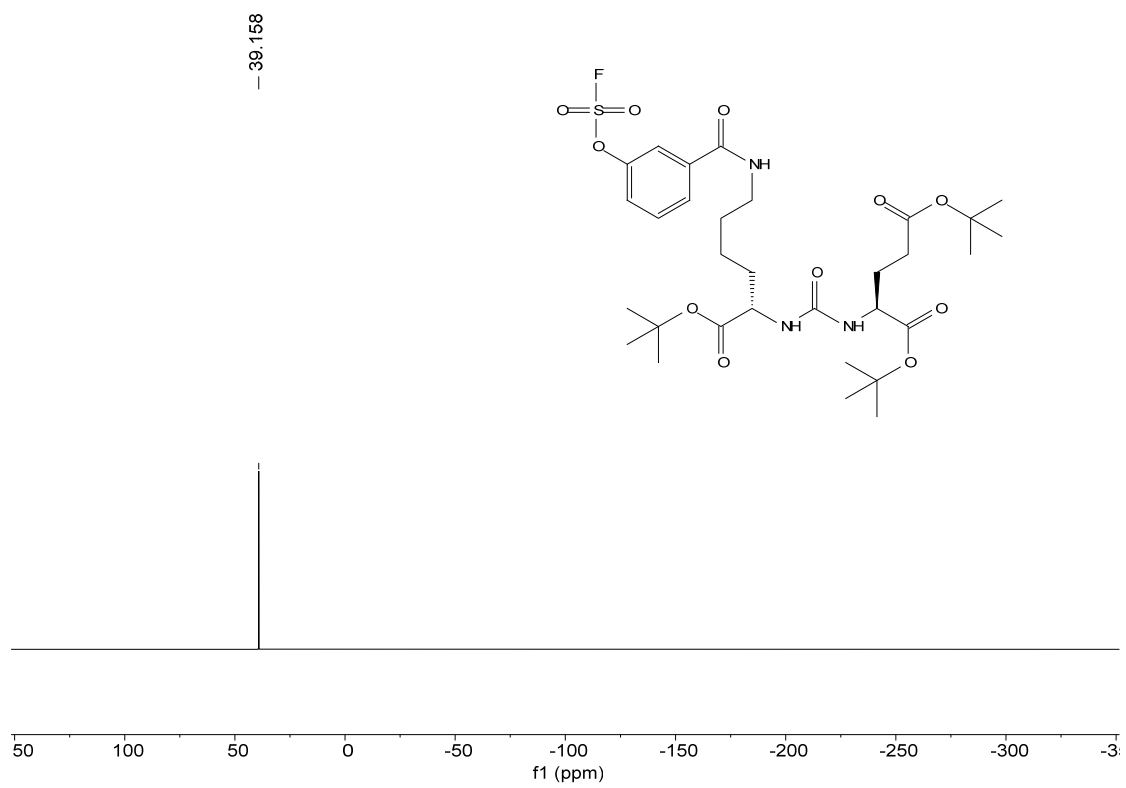

<sup>19</sup>F -NMR spectrum of compound 4 in DMSO.

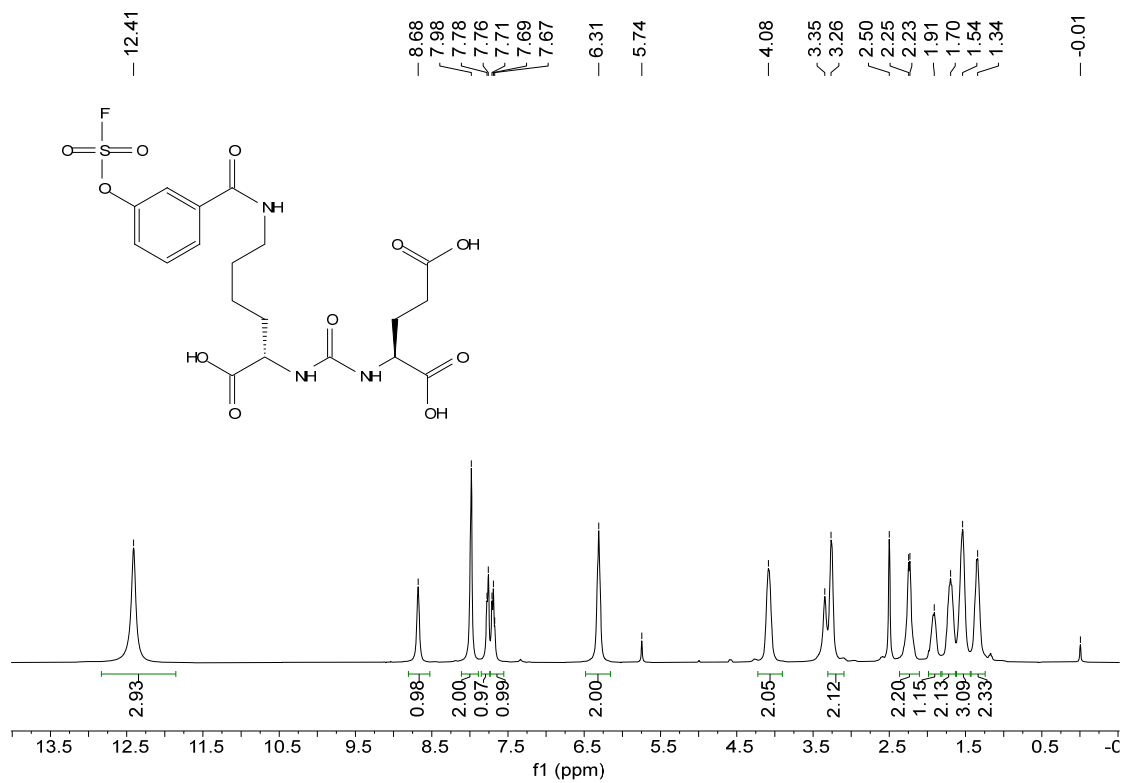

$^1\text{H}$ -NMR spectrum of compound **M01** in DMSO.

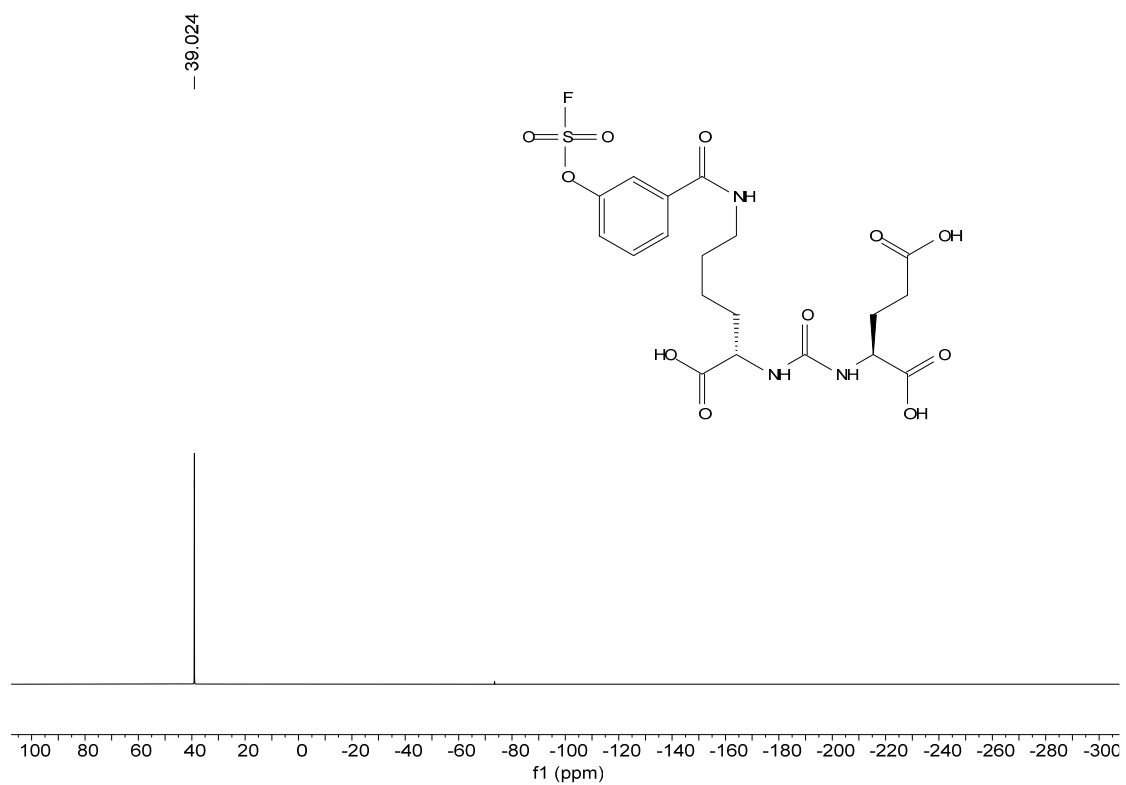

$^{19}\text{F}$ -NMR spectrum of compound **M01** in DMSO.



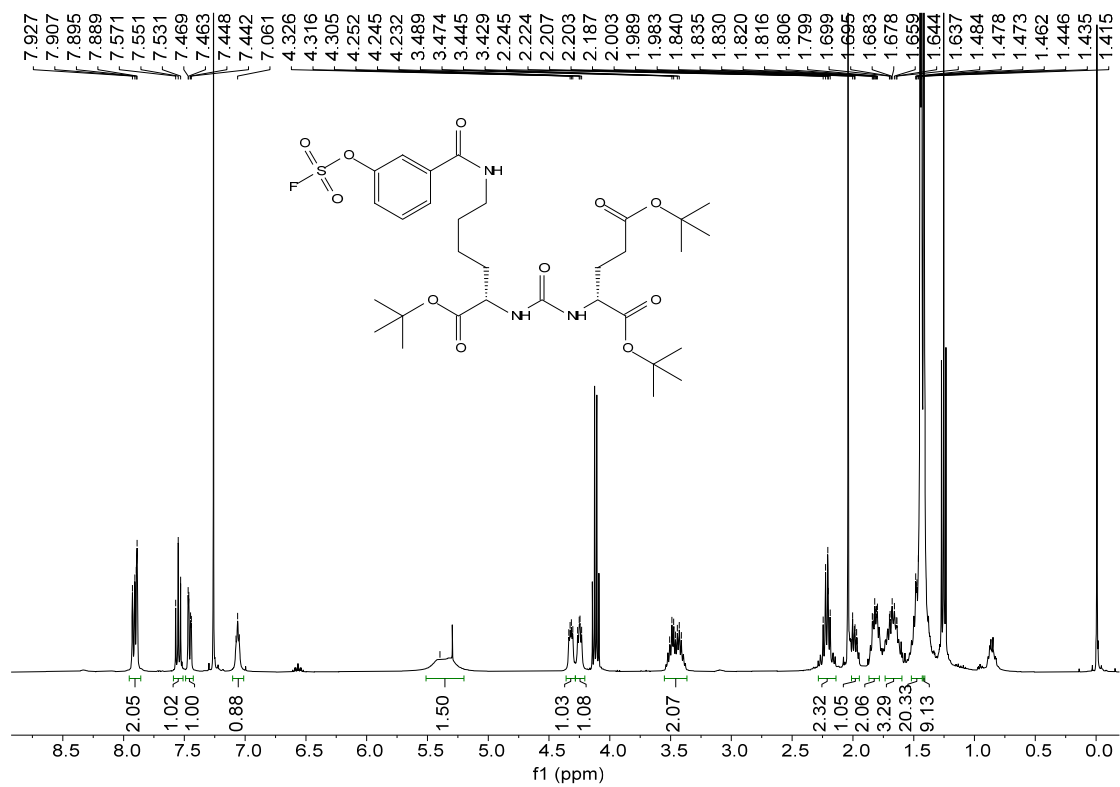

<sup>1</sup>H-NMR spectrum of compound 5 in CDCl<sub>3</sub>.

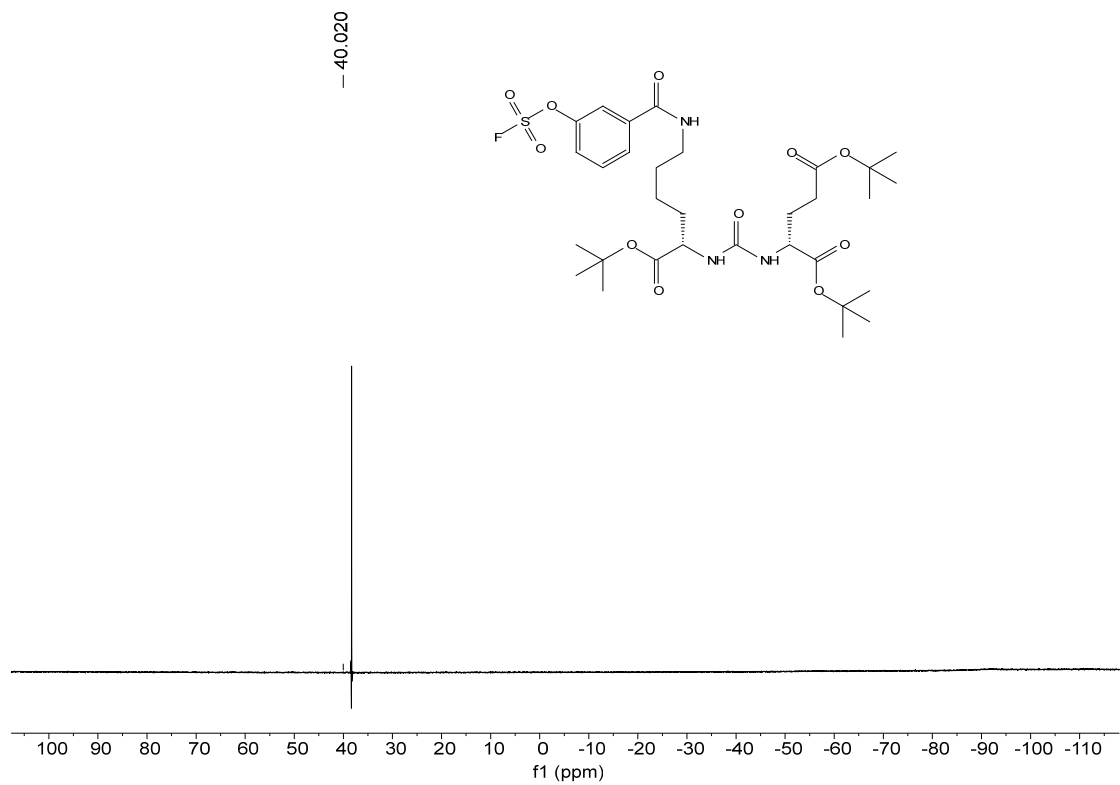

<sup>19</sup>F-NMR spectrum of compound 5 in CDCl<sub>3</sub>.

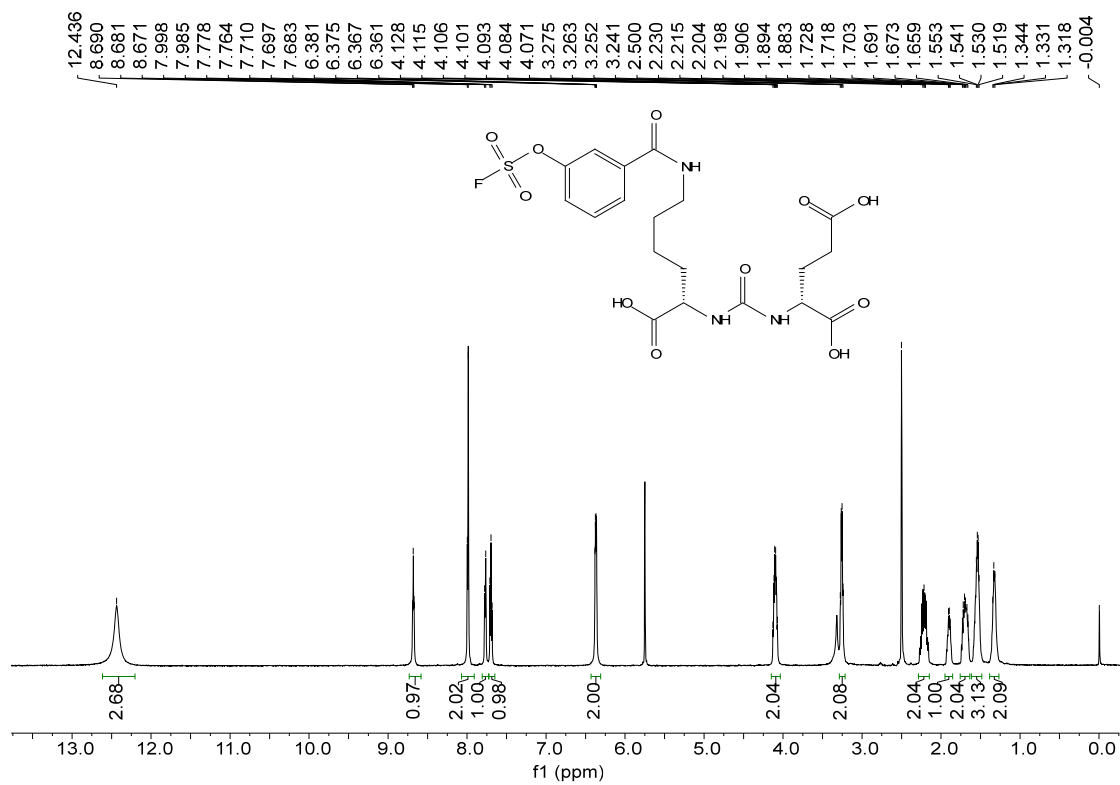

<sup>1</sup>H-NMR spectrum of compound **M02** in DMSO.

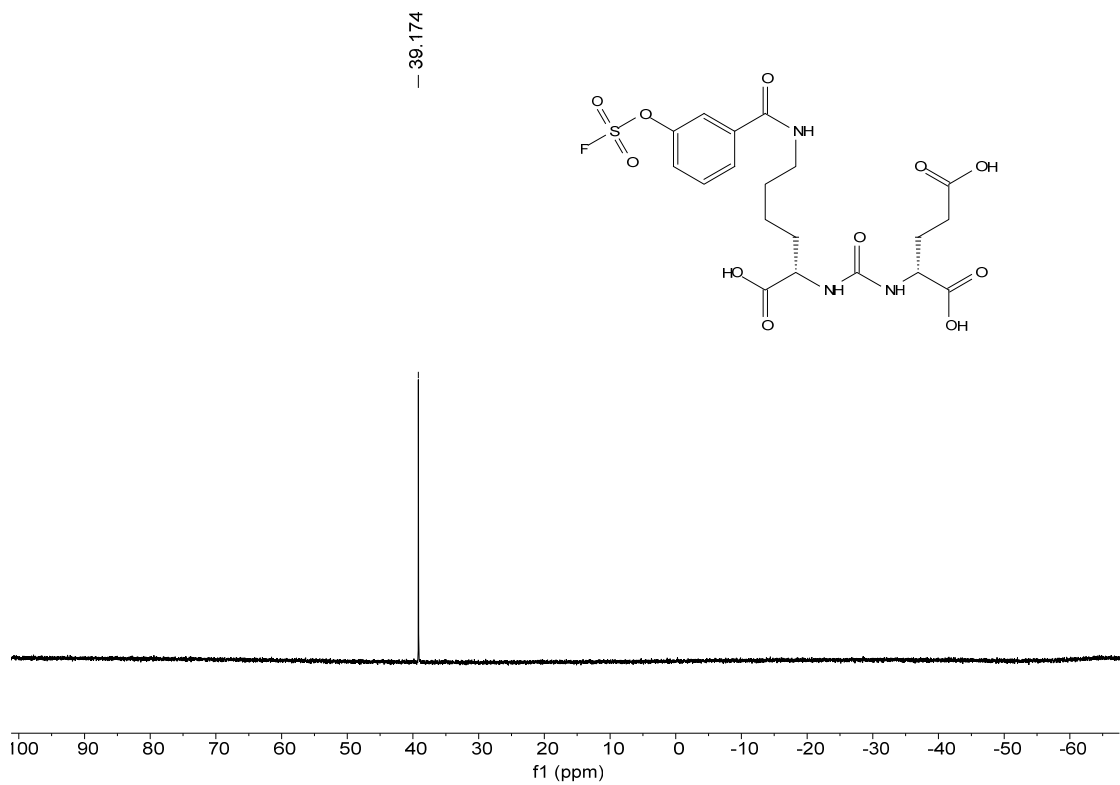

<sup>19</sup>F-NMR spectrum of compound **M02** in DMSO.

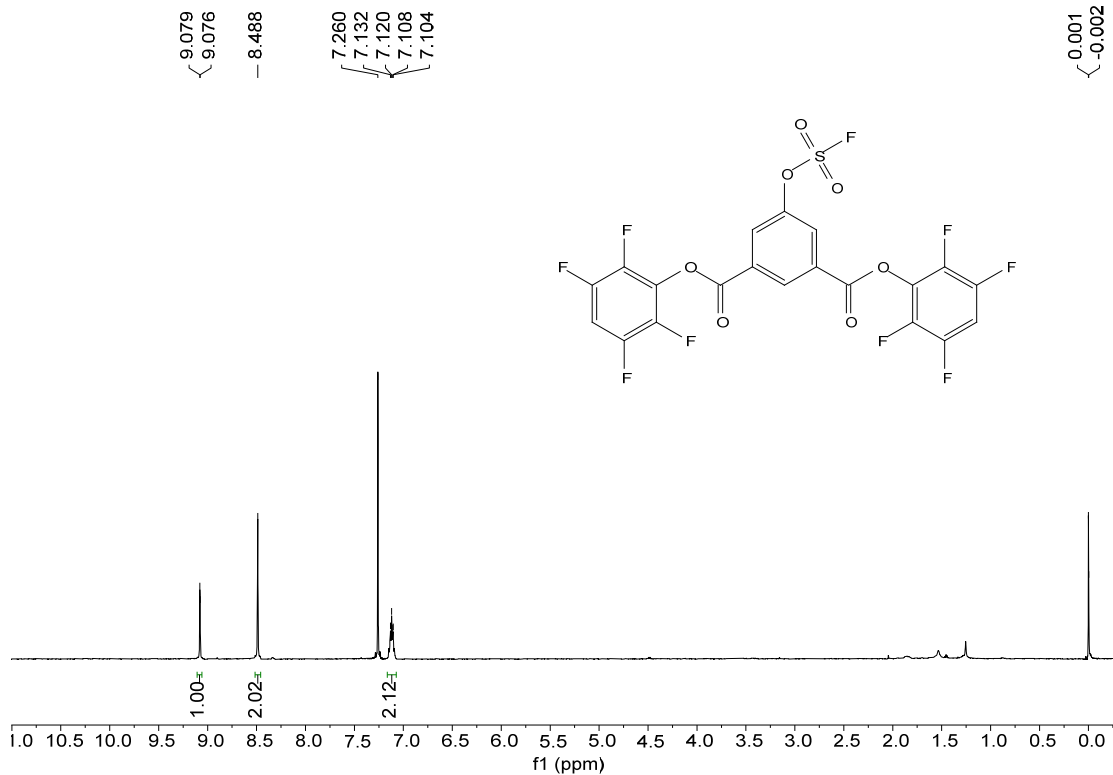

<sup>1</sup>H-NMR spectrum of compound **8** in CDCl<sub>3</sub>.

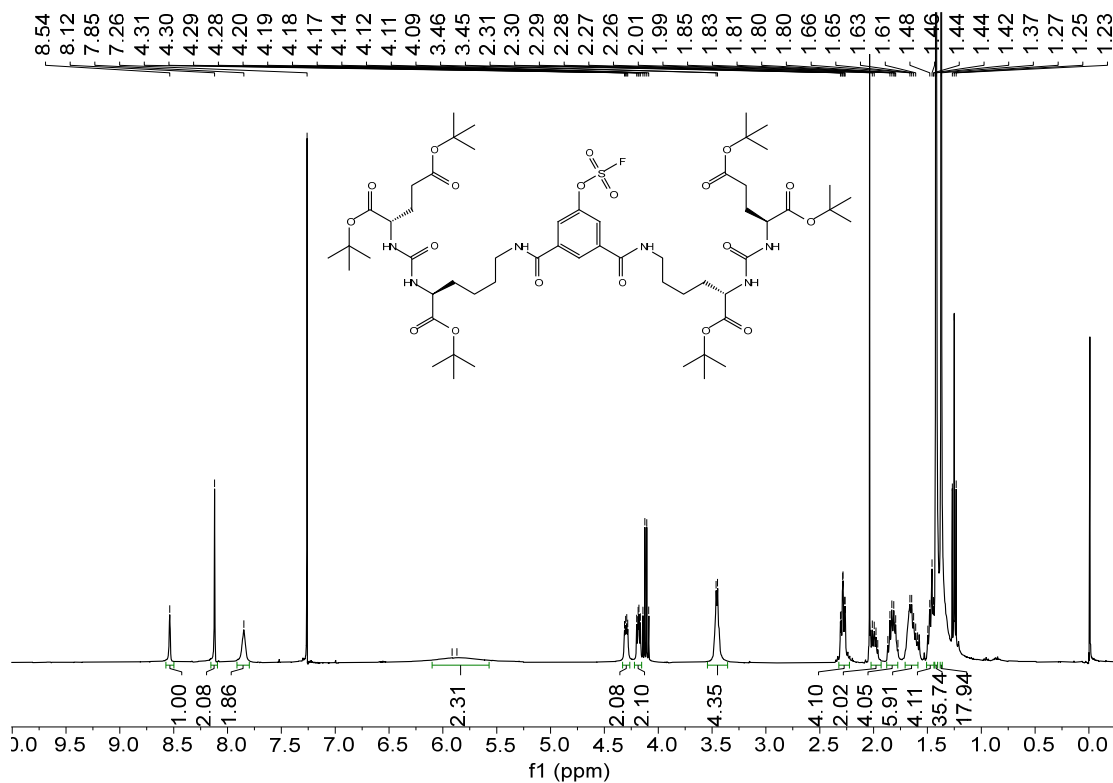

<sup>1</sup>H-NMR spectrum of compound **9** in DMSO.

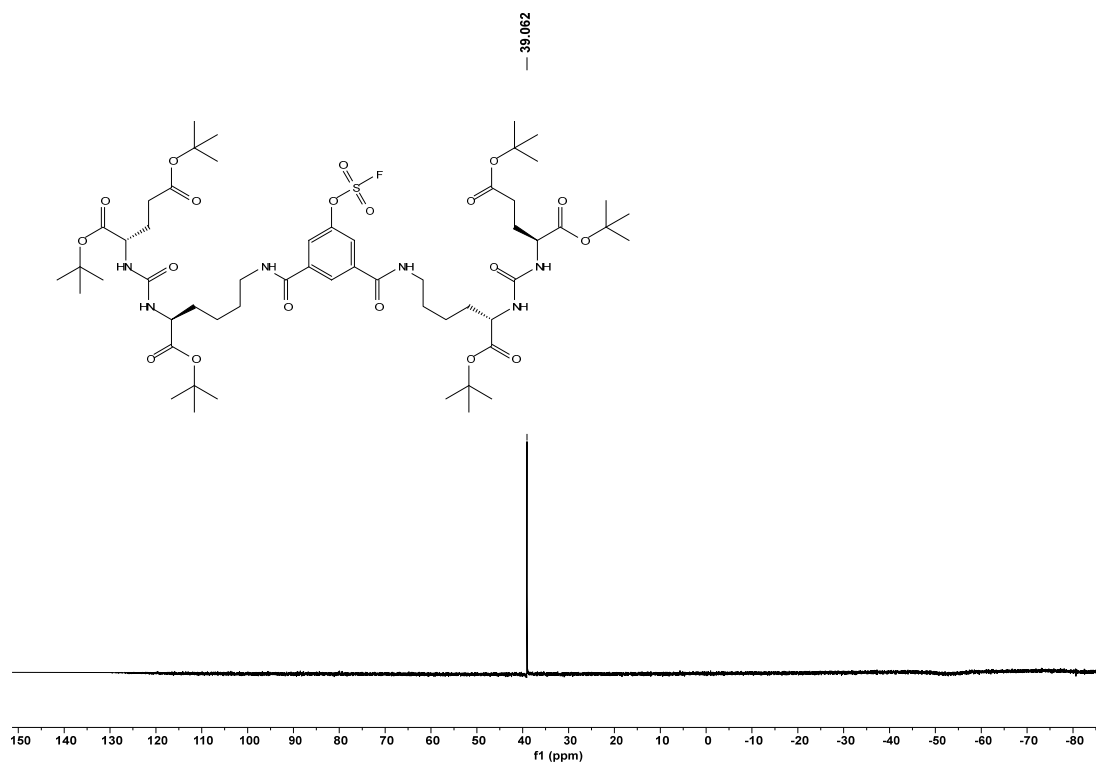

$^{19}\text{F}$ -NMR spectrum of compound **9** in DMSO.

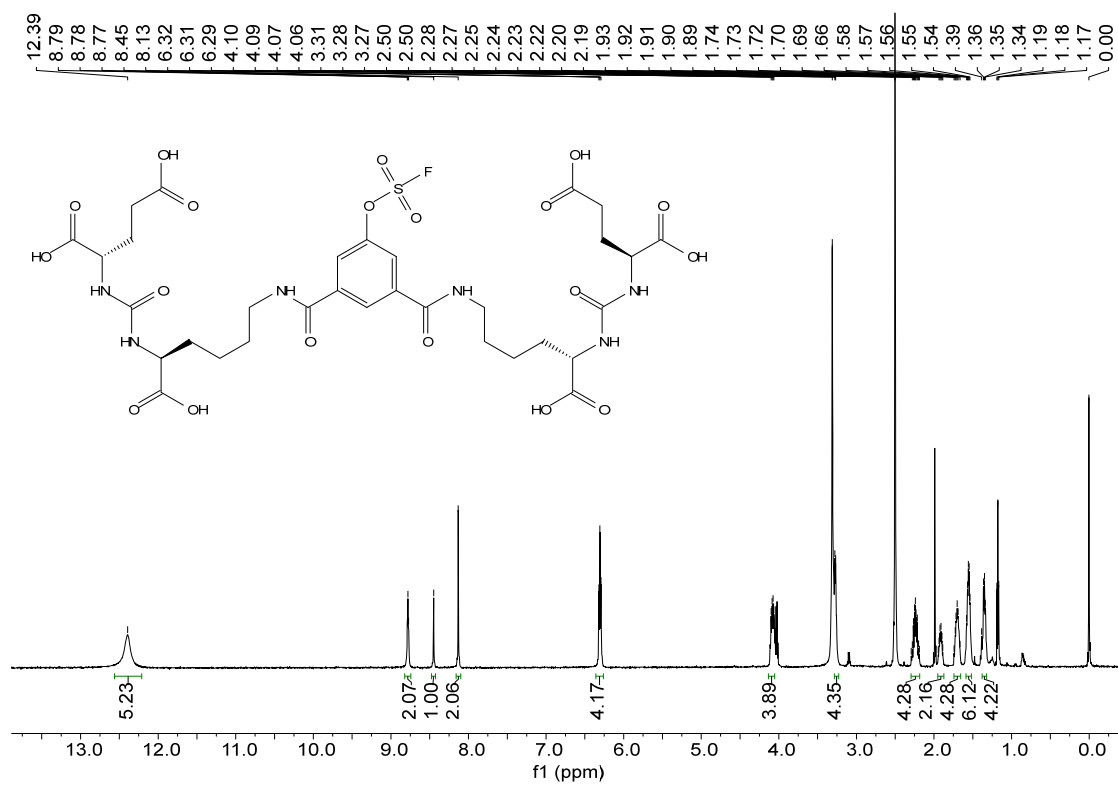

$^1\text{H}$ -NMR spectrum of compound **D01** in DMSO.

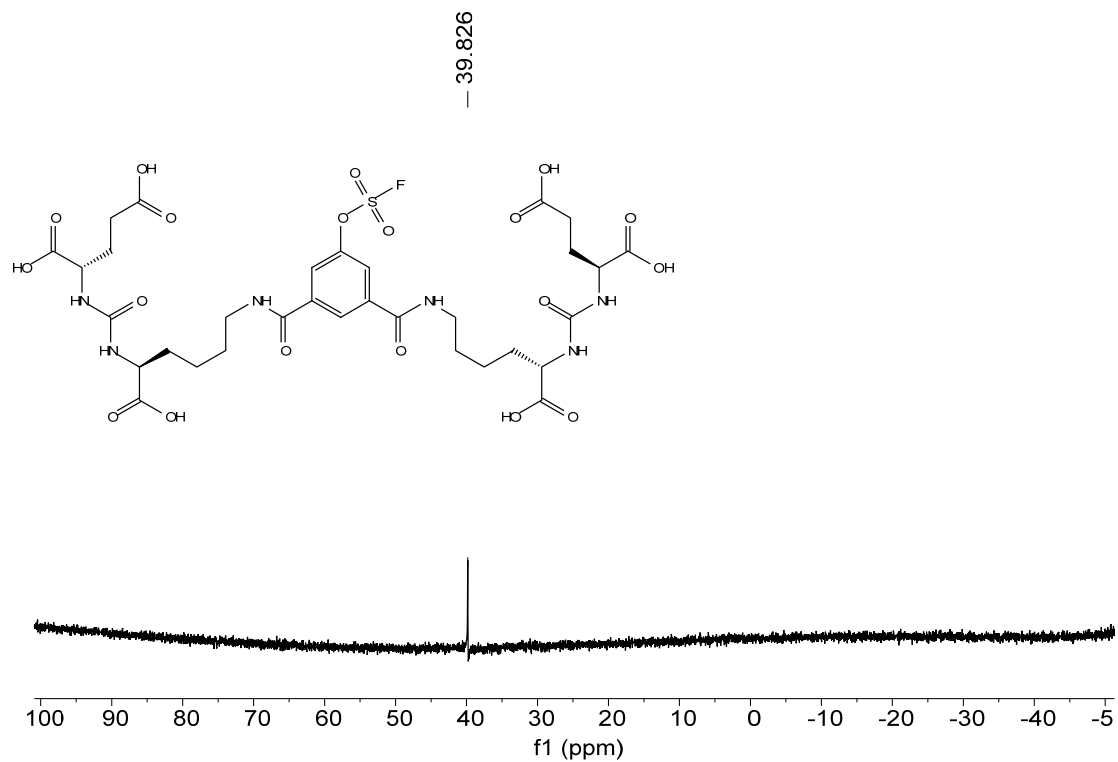

$^{19}\text{F}$  -NMR spectrum of compound **D01** in DMSO.

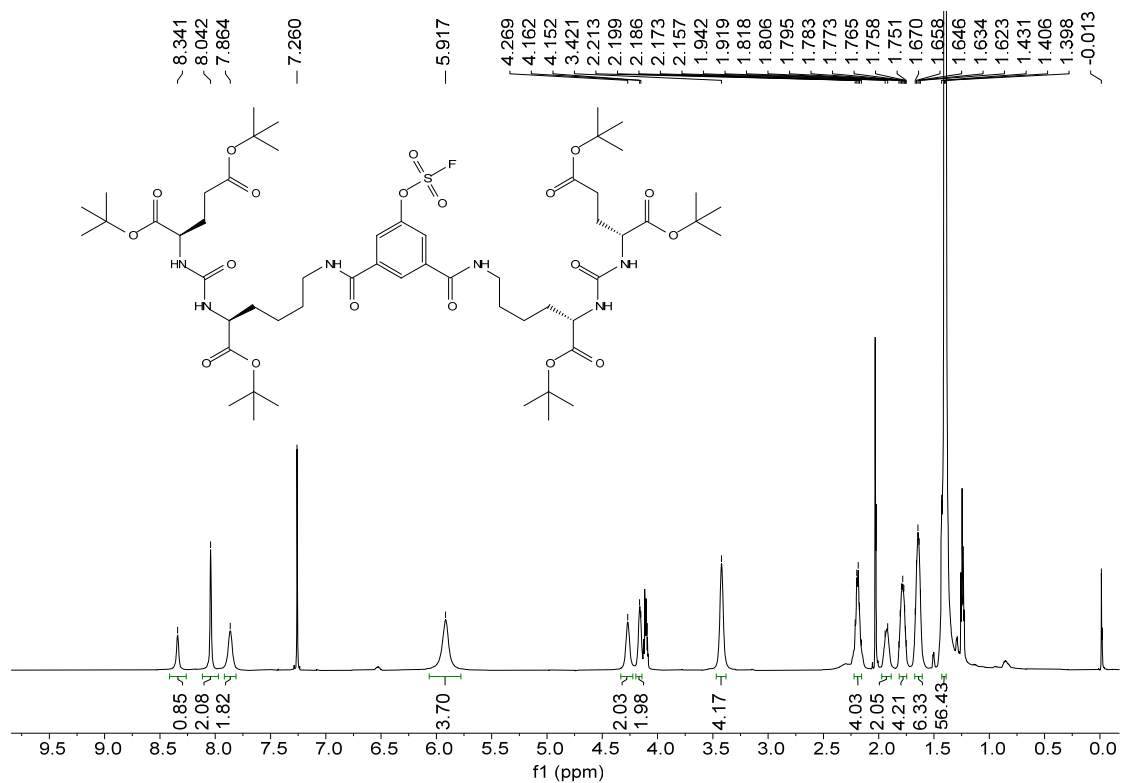

$^1\text{H}$  -NMR spectrum of compound **10** in  $\text{CDCl}_3$ .

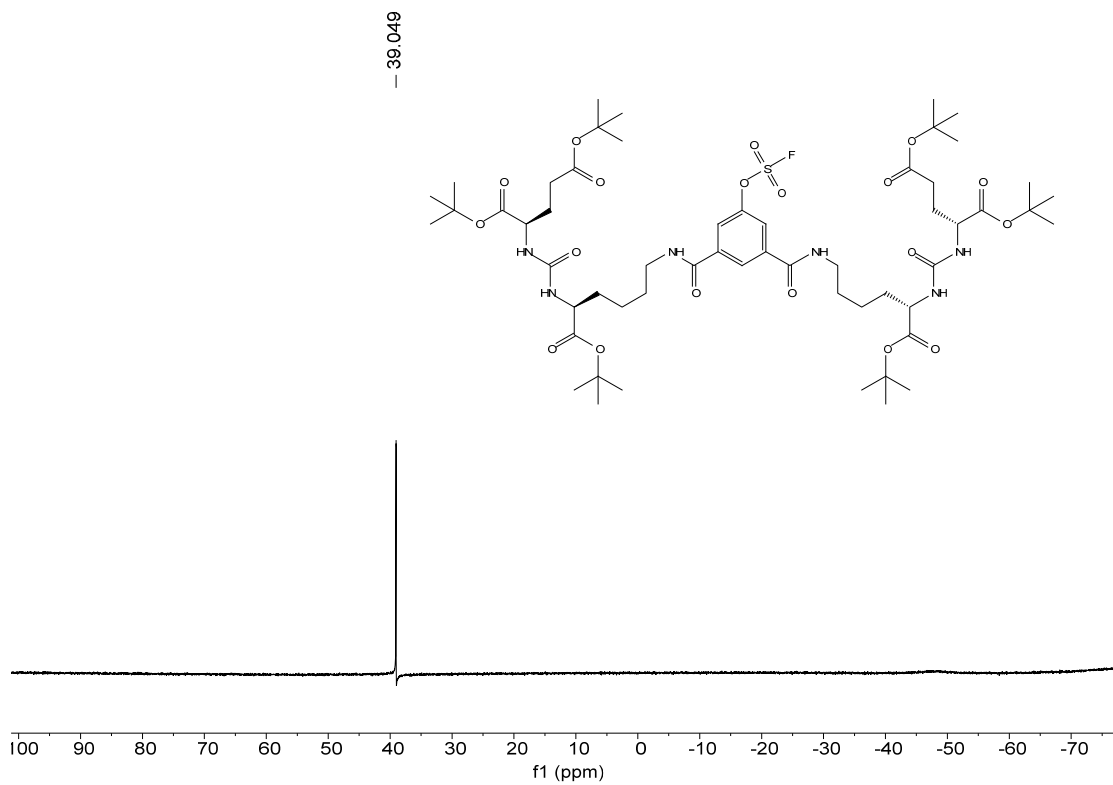

$^{19}\text{F}$  -NMR spectrum of compound **10** in  $\text{CDCl}_3$ .

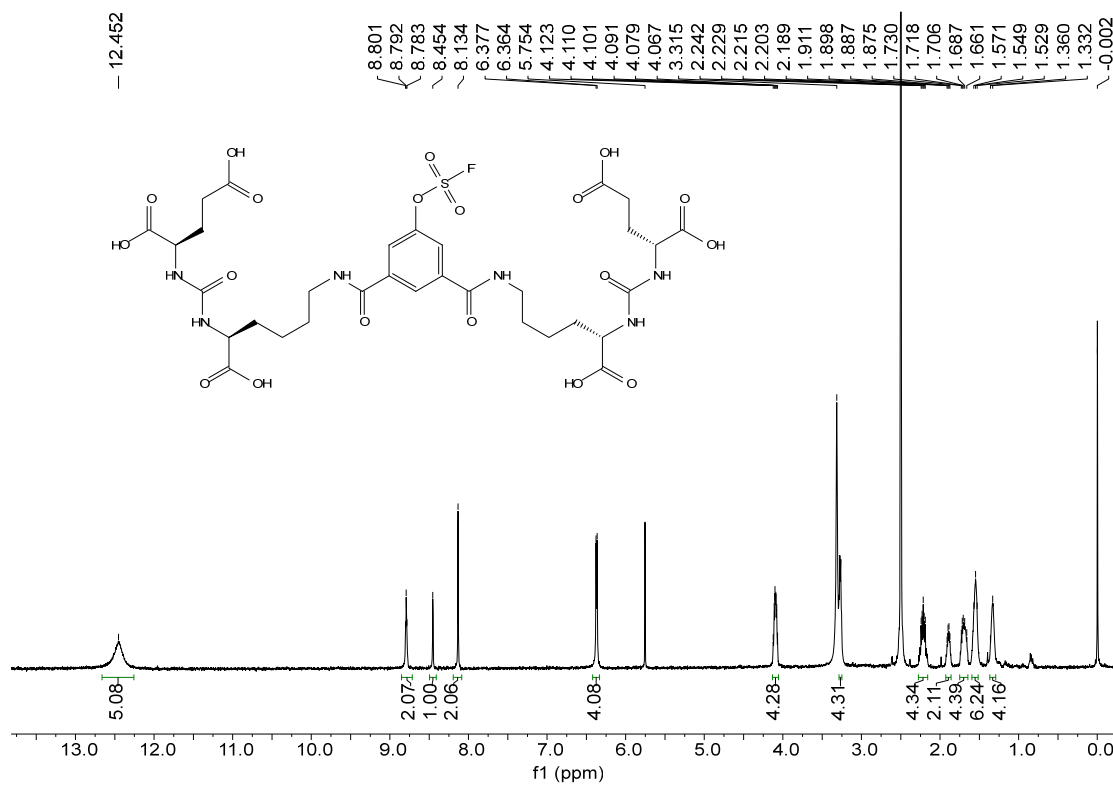

$^1\text{H}$  -NMR spectrum of compound **D02** in  $\text{DMSO}$ .

— 39.848

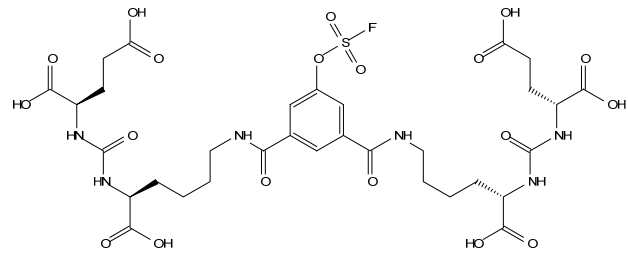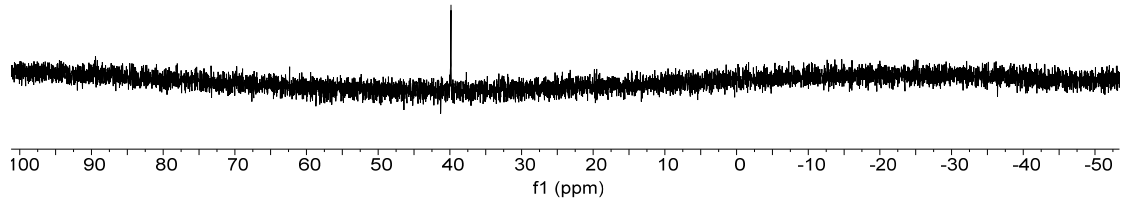

<sup>19</sup>F -NMR spectrum of compound **D02** in DMSO.

## Supplementary figures and tables:

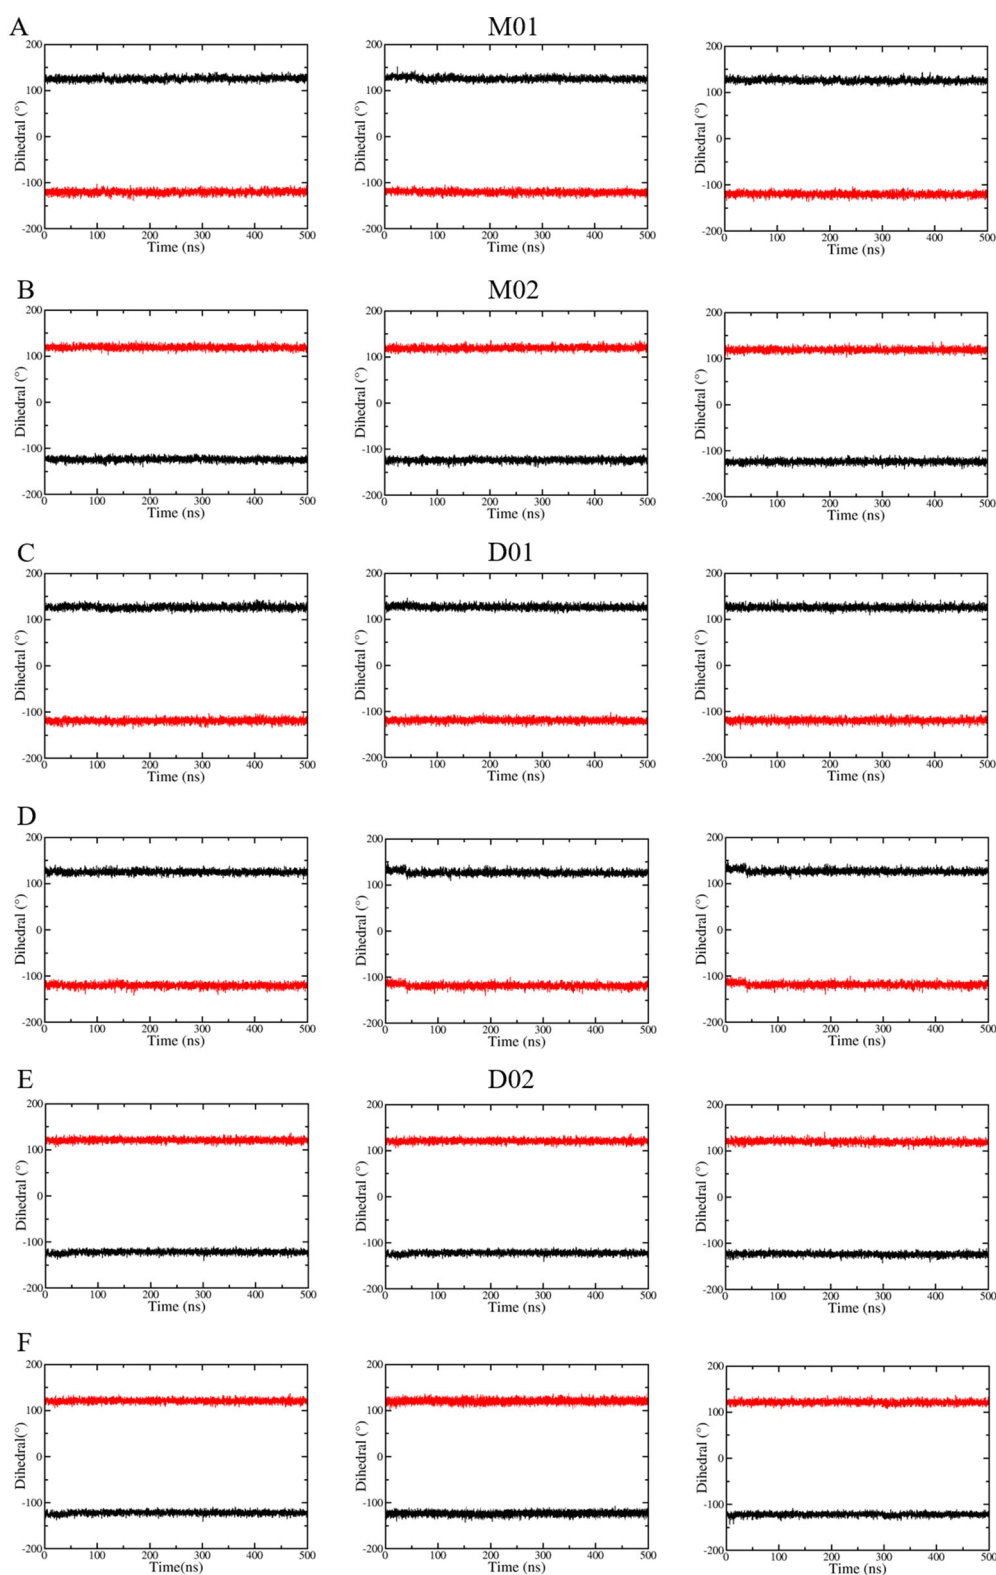

Figure S1. The variations of ligand dihedral angles along the simulation times. The black and red lines indicate the N-C-CA\*-CB and N-C-CA-HA dihedral angles of glutamate group respectively for ligands M01, M02, D01, and D02.



Table S1. The physicochemical properties (calculated by RDKit) and ADMET analysis (predicted by ADMETlab 2.0, <https://admetmesh.scbdd.com/>) for all studied inhibitors.

|                                   | DCFPyL              | M01                 | M02                  | D01                 | D02                  | S01                  | S02                  |
|-----------------------------------|---------------------|---------------------|----------------------|---------------------|----------------------|----------------------|----------------------|
| <b>Physicochemical properties</b> |                     |                     |                      |                     |                      |                      |                      |
| Log P                             | -0.819              | 0.442               | 0.679                | 0.075               | 0.410                | -0.132               | -4.773               |
| Mol. Wt.                          | 442.150             | 521.110             | 521.110              | 866.230             | 866.230              | 1000.160             | 601.060              |
| #HBA                              | 12                  | 14                  | 14                   | 25                  | 25                   | 26                   | 12                   |
| #HBD                              | 6                   | 6                   | 6                    | 12                  | 12                   | 14                   | 6                    |
| TPSA                              | 195.020             | 225.500             | 225.500              | 407.630             | 407.630              | 422.460              | 199.200              |
| <b>ADMET</b>                      |                     |                     |                      |                     |                      |                      |                      |
| PPB                               | 23.896%             | 84.049%             | 85.517%              | 67.609%             | 69.920%              | 73.653%              | 77.497%              |
| VD                                | 0.368               | 0.332               | 0.256                | 0.812               | 0.692                | 0.741                | 0.413                |
| Fu                                | 59.594%             | 19.653%             | 16.699%              | 27.909%             | 22.620%              | 20.289%              | 11.837%              |
| MDCK Permeability                 | $15 \times 10^{-6}$ | $12 \times 10^{-6}$ | $4.6 \times 10^{-6}$ | $15 \times 10^{-6}$ | $4.8 \times 10^{-6}$ | $5.6 \times 10^{-6}$ | $140 \times 10^{-6}$ |
| T <sub>1/2</sub>                  | 0.708               | 0.897               | 0.925                | 0.922               | 0.952                | 0.857                | 0.824                |
| Bioconcentration Factors          | -0.051              | -0.053              | -0.065               | -0.355              | -0.376               | -0.062               | 0.181                |
| IGC <sub>50</sub>                 | 2.407               | 2.695               | 2.636                | 2.564               | 2.474                | 3.305                | 3.116                |
| LC <sub>50</sub> FM               | 3.824               | 4.080               | 4.04                 | 4.434               | 4.356                | 4.408                | 4.299                |
| LC <sub>50</sub> DM               | 2.803               | 2.908               | 2.957                | 1.846               | 1.944                | 2.266                | 4.004                |

Log P: Log of the octanol/water partition coefficient.

Mol. Wt.: Molecular weight. The unit is Da.

#HBA: Number of hydrogen bond acceptors.

#HBD: Number of hydrogen bond donors.

TPSA: Topological Polar surface Area. The unit is Å<sup>2</sup>.

PPB: Plasma Protein Binding.

VD: Volume Distribution. The unit is L/kg.

Fu: The fraction unbound in plasms.

MDCK Permeability: The ability of substances to pass through MDCK cells. The unit is cm/s.

T<sub>1/2</sub>: The output value is the probability of having long half-life.

Bioconcentration Factors: Bioconcentration factors are used for considering secondary poisoning potential and assessing risks to human health via the food chain. The unit is  $-\log_{10}[(\text{mg/L})/(1000 \cdot \text{MW})]$ .

IGC<sub>50</sub>: Tetrahymena pyriformis 50 percent growth inhibition concentration. The unit is  $-\log_{10}[(\text{mg/L})/(1000 \cdot \text{MW})]$ .

LC<sub>50</sub>FM: 96-hour fathead minnow 50 percent lethal concentration. The unit is  $-\log_{10}[(\text{mg/L})/(1000 \cdot \text{MW})]$ .

LC<sub>50</sub>DM: 48-hour daphnia magna 50 percent lethal concentration. The unit is  $-\log_{10}[(\text{mg/L})/(1000 \cdot \text{MW})]$ .

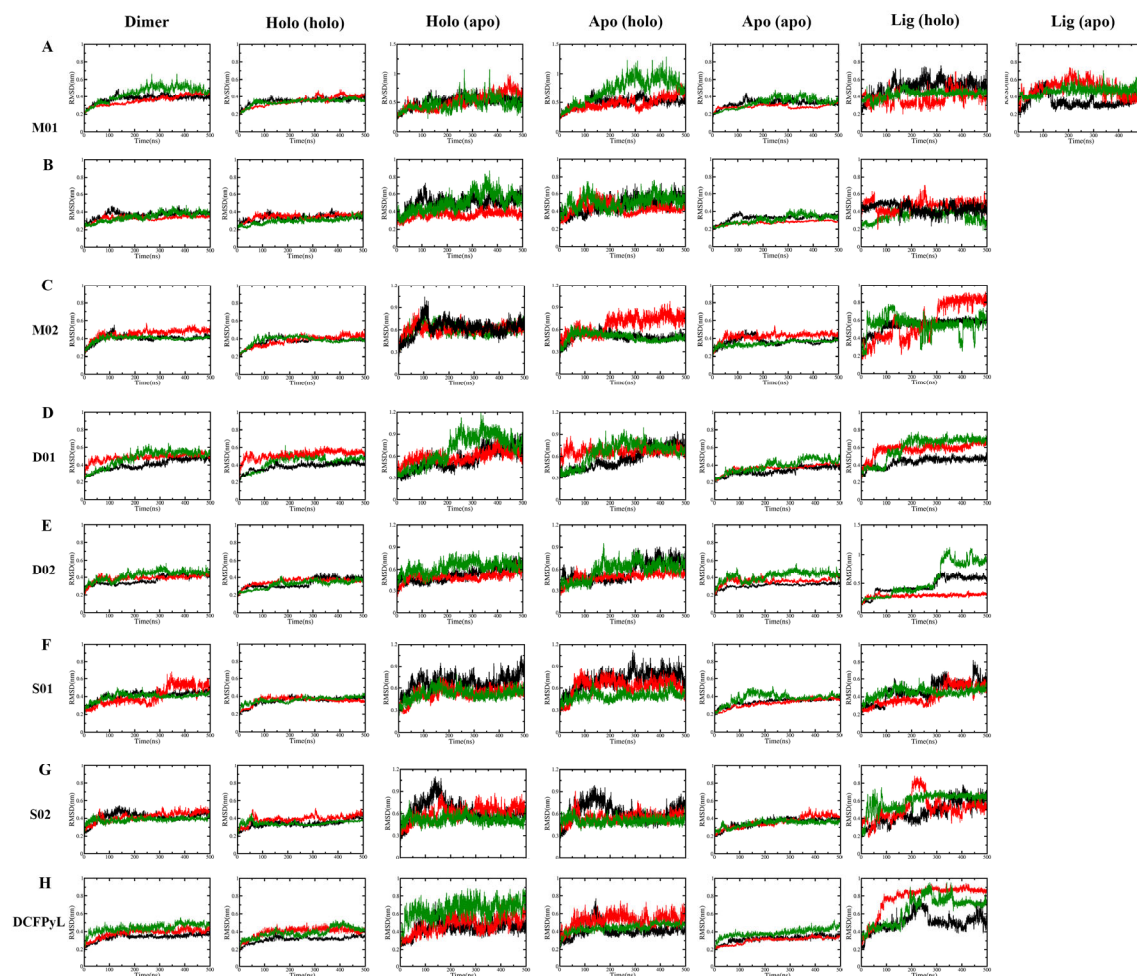

Figure S2. The stabilities of all PMSA-ligands in MD simulations. The RMSDs were calculated for  $C\alpha$  atoms of PMSA dimer (superimposed on all  $C\alpha$  atoms on both chains, noted as Dimer),  $C\alpha$  atoms of holo-monomer (superimposed on all  $C\alpha$  atoms of , noted as Chain A (fit A)),  $C\alpha$  atoms of holo-monomer (superimposed on all  $C\alpha$  atoms of chain B, noted as holo-monomer (fit apo-monomer)),  $C\alpha$  atoms of apo-monomer (superimposed on all  $C\alpha$  atoms of holo-monomer, noted as apo-monomer (fit holo-monomer)),  $C\alpha$  atoms of apo-monomer (superimposed on all  $C\alpha$  atoms of apo-monomer, noted as apo-monomer (fit apo-monomer)), heavy atoms of the ligand binding to holo-monomer (superimposed on all  $C\alpha$  atoms on holo-monomer, noted as LIG (holo-monomer)), and heavy atoms of the ligand binding to apo-monomer (superimposed on all  $C\alpha$  atoms of apo-monomer, noted as LIG (apo-monomer)). Different trajectories are represented by different colors (black, red, and green).

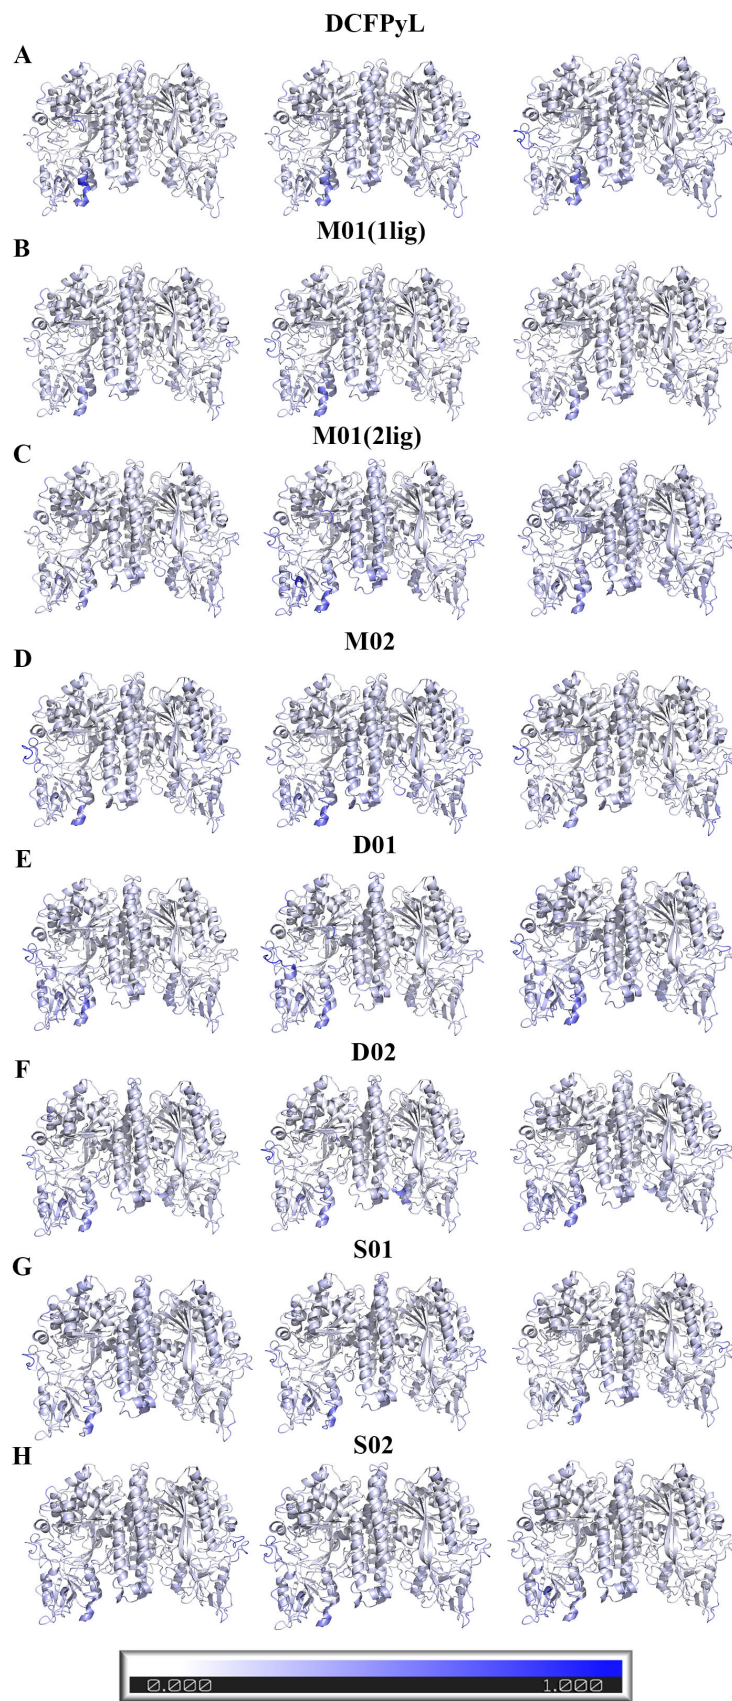

Figure S3. The RMSFs (in nm) of the PSMA dimers with different ligands, superposed on all Ca atoms.

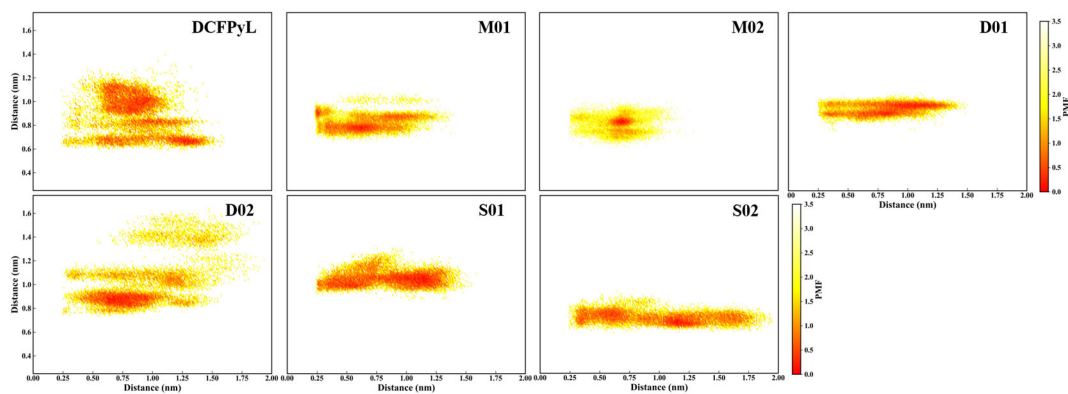

Figure S4. The potential of Mean Forces (PMFs in kcal/mol) of all systems, projected on the minimum distance of Phe546 and Tyr700 and the distance between the center of mass of the ligand and the Zn-binding group (ZBG). The PMF plots were calculated based on the conventional MD simulations. The distance was calculated using the GROMACS tool (`gmx pairdist` or `gmx distance`), then the entire range of distances was divided into two-dimensional bins with dimensions of  $0.02 \times 0.02 \text{ nm}^2$ , finally the probability ( $p_{i,j}$ ) of the number of data in each bin was calculated. The PMF was calculated according to the probability:  $\text{PMF}(i,j) = -RT \times \ln p_{i,j}$ .

Table S2. The clustering analysis results of all simulations. The clusters with a proportion larger than 0.1% are listed.

| <b>Tracers</b> | <b>DCFPyL</b> | <b>M01</b> | <b>M02</b> | <b>D01</b> | <b>D02</b> | <b>S01</b> | <b>S02</b> |
|----------------|---------------|------------|------------|------------|------------|------------|------------|
| <b>C1</b>      | 68.89%        | 66.44%     | 60.69%     | 38.53%     | 65.65%     | 43.86%     | 42.47%     |
| <b>C2</b>      | 22.92%        | 24.51%     | 19.97%     | 28.95%     | 15.85%     | 26.29%     | 21.08%     |
| <b>C3</b>      | 5.90%         | 4.24%      | 12.21%     | 21.17%     | 12.40%     | 16.36%     | 17.39%     |
| <b>C4</b>      | 1.33%         | 1.93%      | 3.35%      | 5.21%      | 4.70%      | 12.49%     | 7.44%      |
| <b>C5</b>      | 0.69%         | 1.49%      | 2.21%      | 3.34%      | 1.07%      | 0.67%      | 5.66%      |
| <b>C6</b>      | 0.14%         | 0.46%      | 1.18%      | 1.12%      | 0.17%      | 0.19%      | 2.31%      |
| <b>C7</b>      |               | 0.39%      | 0.19%      | 0.57%      |            | 0.10%      | 1.39%      |
| <b>C8</b>      |               | 0.29%      | 0.11%      | 0.56%      |            |            | 0.82%      |
| <b>C9</b>      |               | 0.20%      |            | 0.21%      |            |            | 0.75%      |
| <b>C10</b>     |               |            |            | 0.20%      |            |            | 0.27%      |

C1

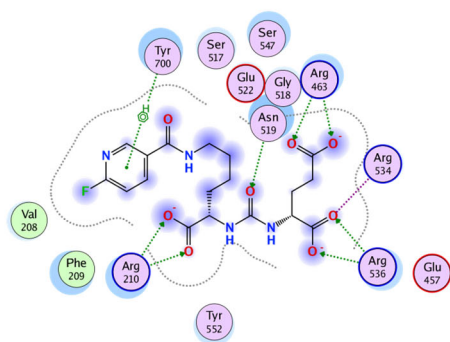

C2

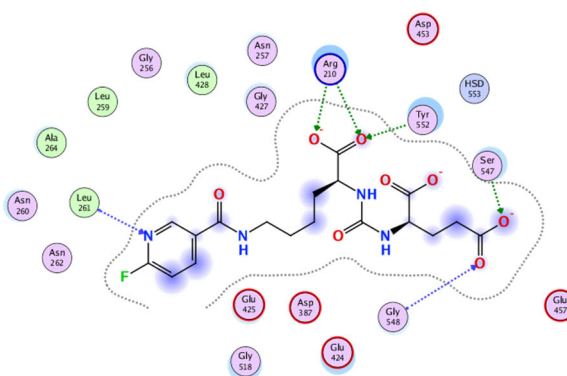

Figure S5. The PSMA-DCFPyL interactions of the representative conformations of the two largest clusters. The initial figures of protein-ligand interactions were generated from PoseEdit, an online platform for analysis of protein-ligand interactions (<https://proteins.plus/>), and then modified according to our simulation setting manually. It is the same for Figs S6-S11.

C1

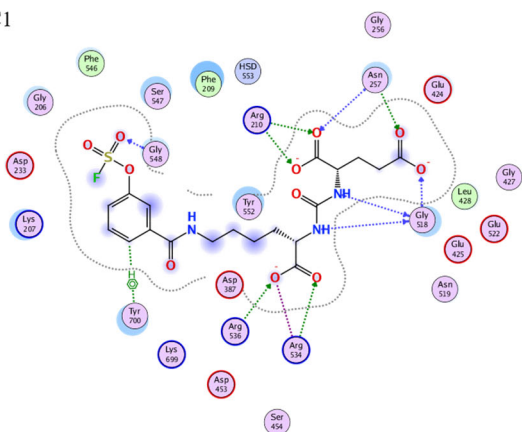

C2

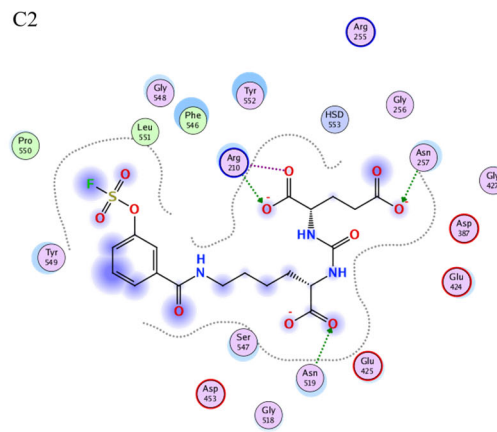

Figure S6. The PSMA-M01 interactions of the representative conformations of the two largest clusters.

C1

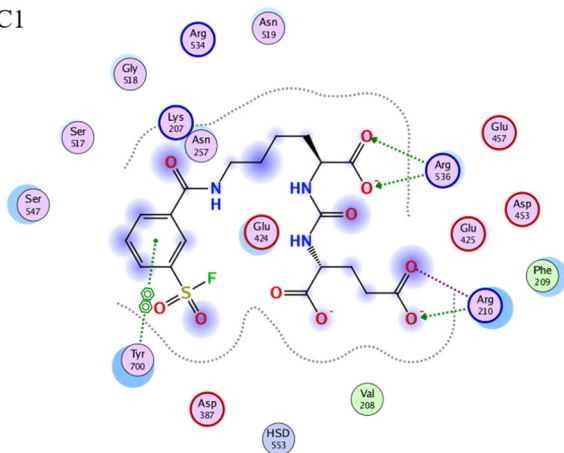

C2

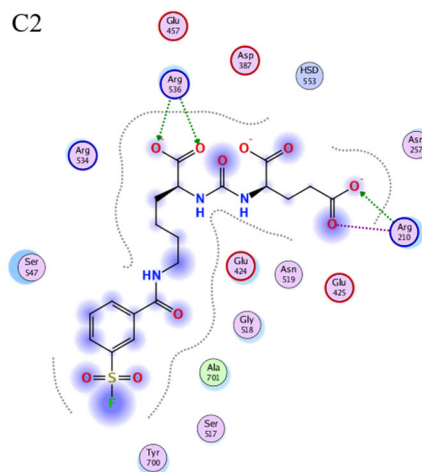

Figure S7. The PSMA-**M02** interactions of the representative conformations of the two largest clusters.



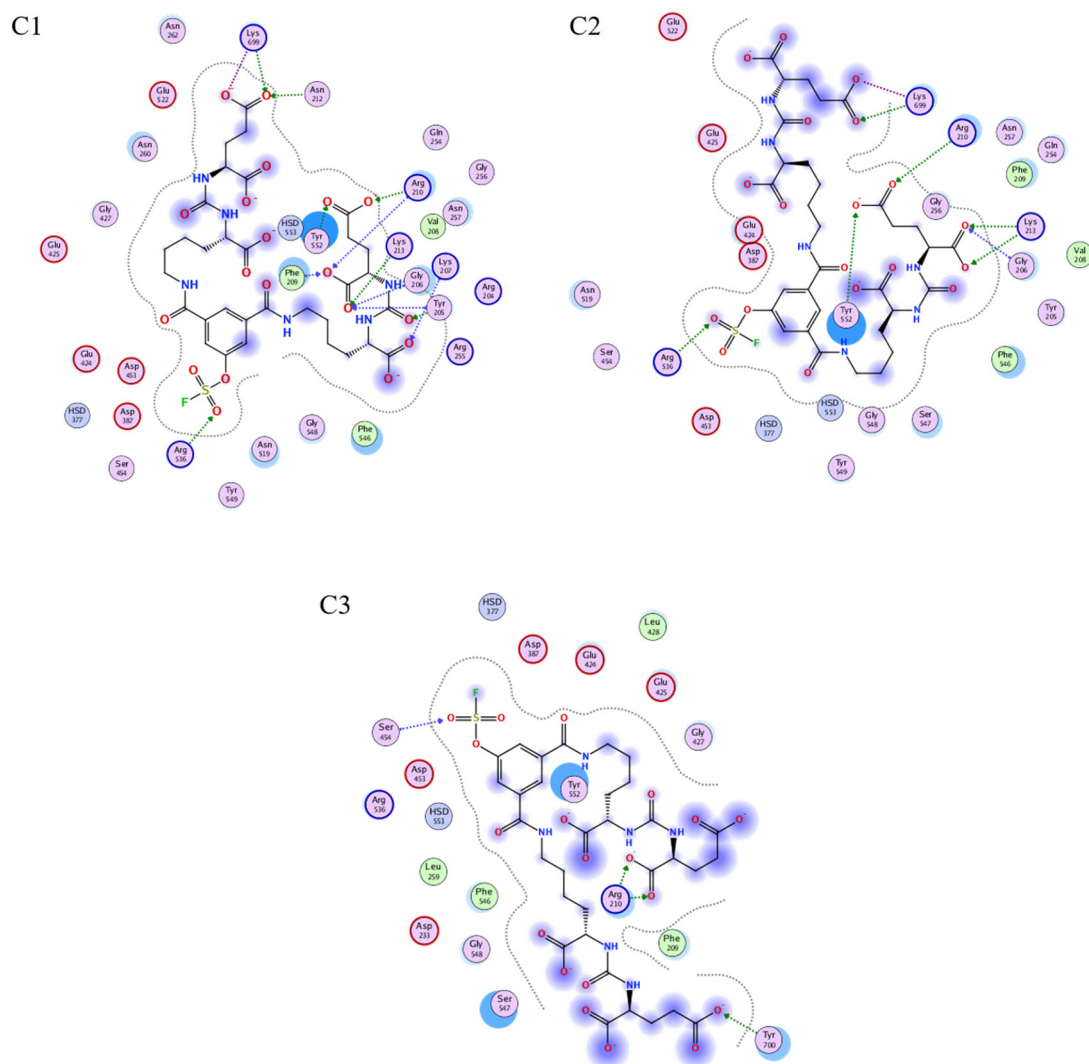

Figure S8. The PSMA-D01 interactions of the representative conformations of the three largest clusters.



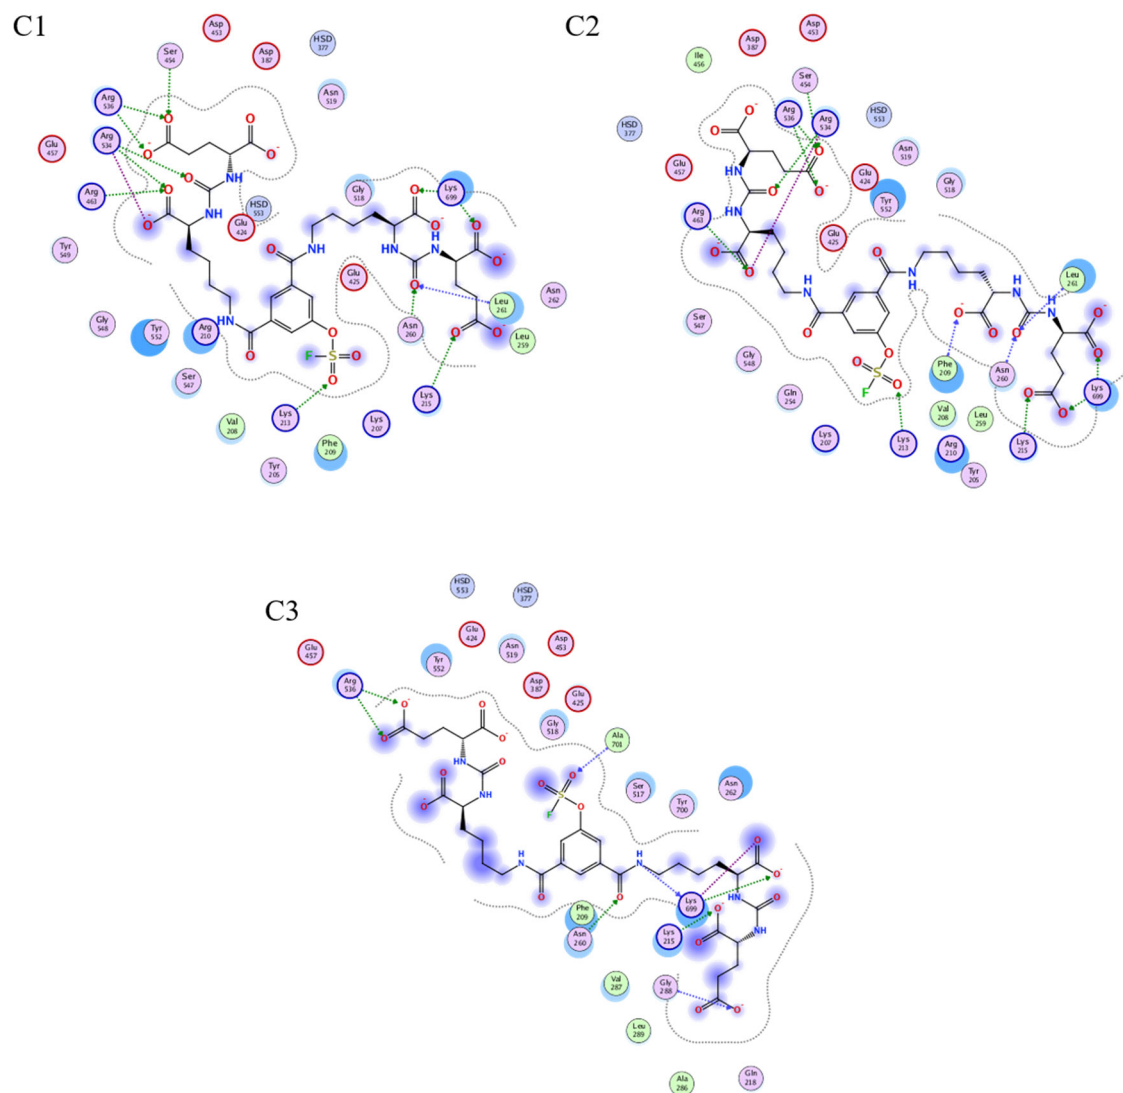

Figure S9. The PSMA-D02 interactions of the representative conformations of the three largest clusters.

C1

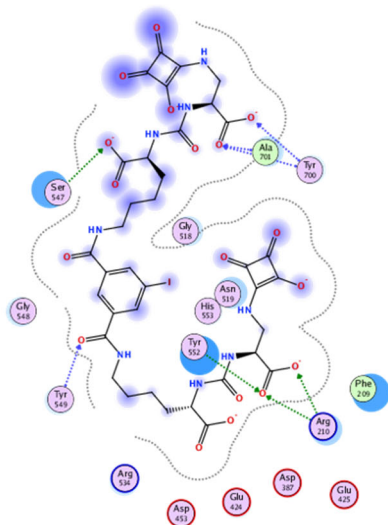

C2

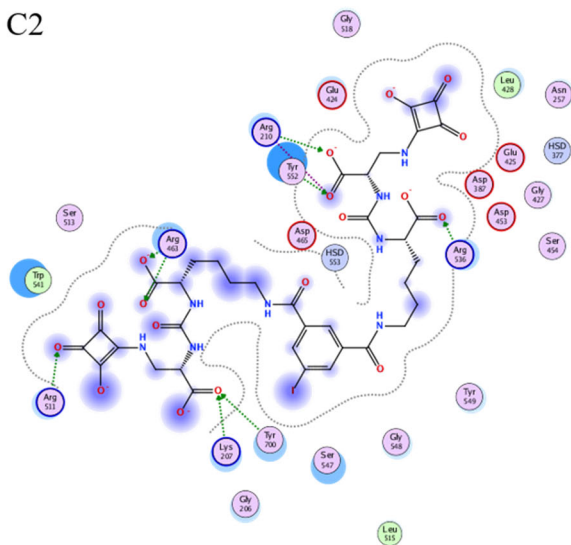

C3

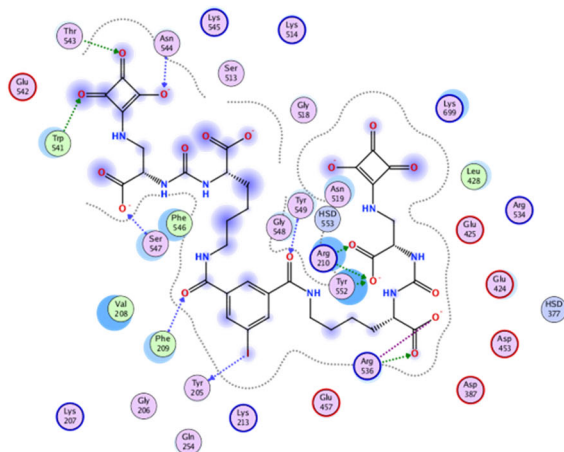

C4

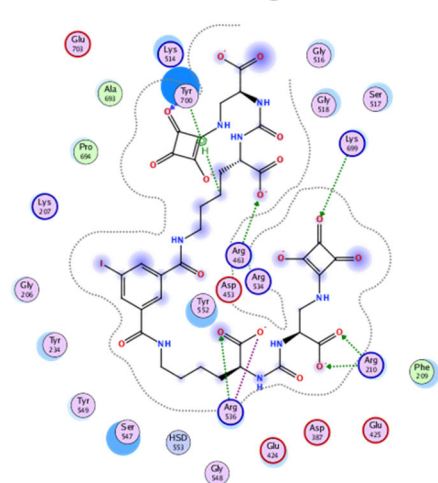

Figure S10. The PSMA-S01 interactions of the representative conformations of the four largest clusters.

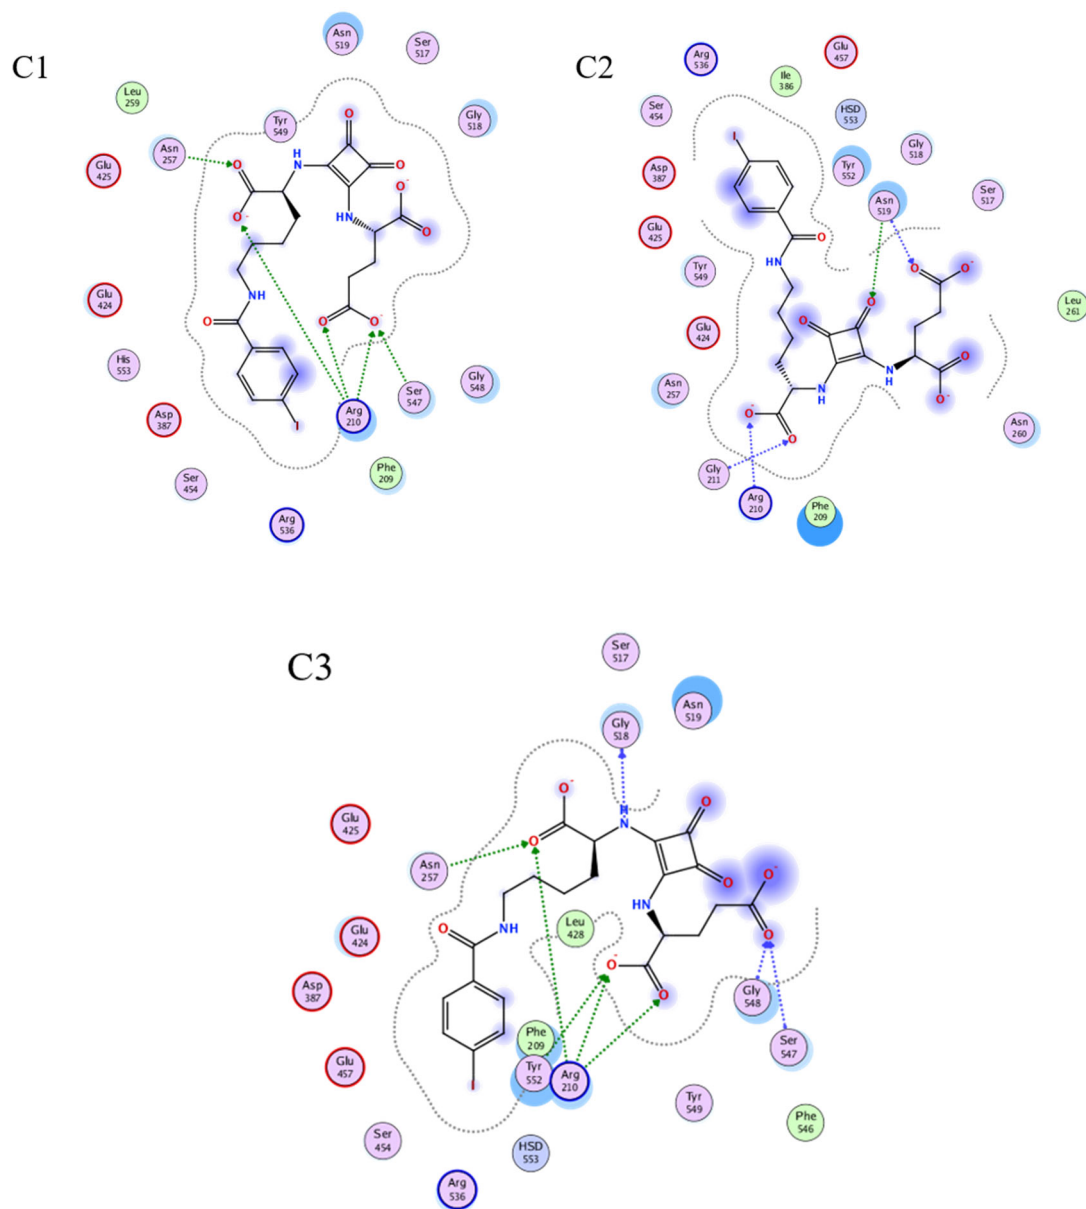

Figure S11. The PSMA-S02 interactions of the representative conformations of the three largest clusters.

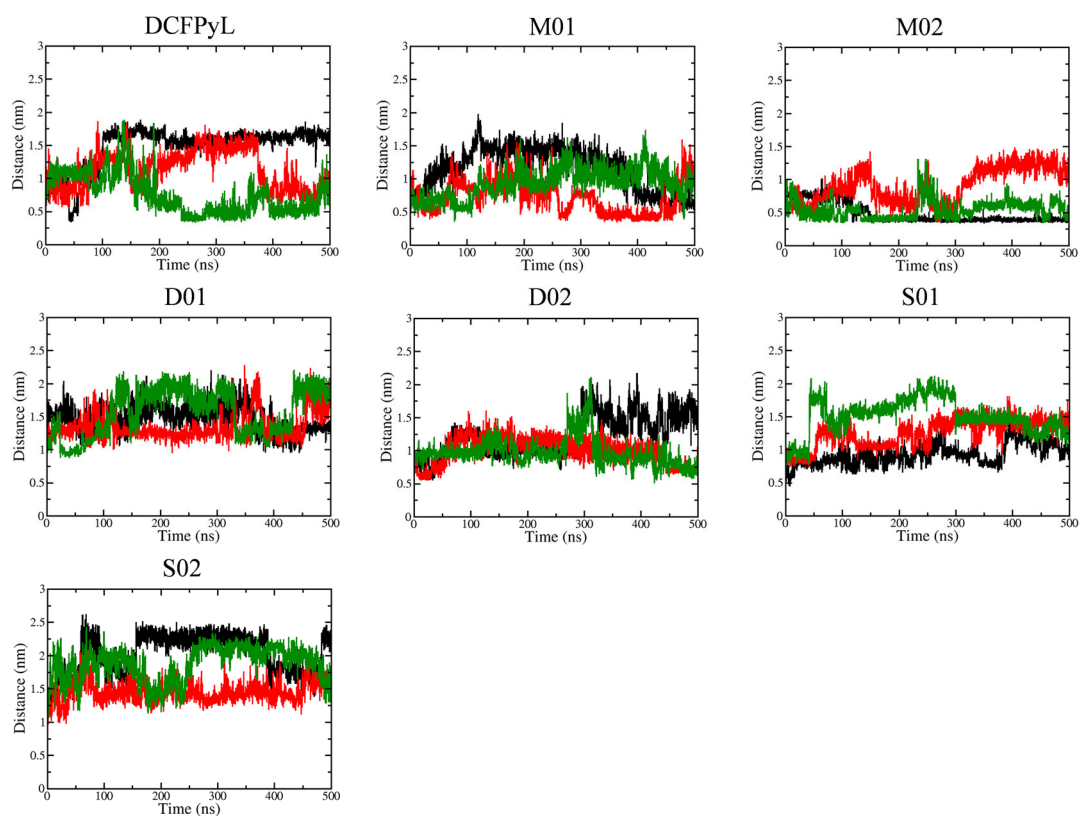

Figure S12. The evolutions of distances between the center of mass of the pyridine/benzene rings of ligands and Tyr700 along the simulation time. Different trajectories are represented by different colors.

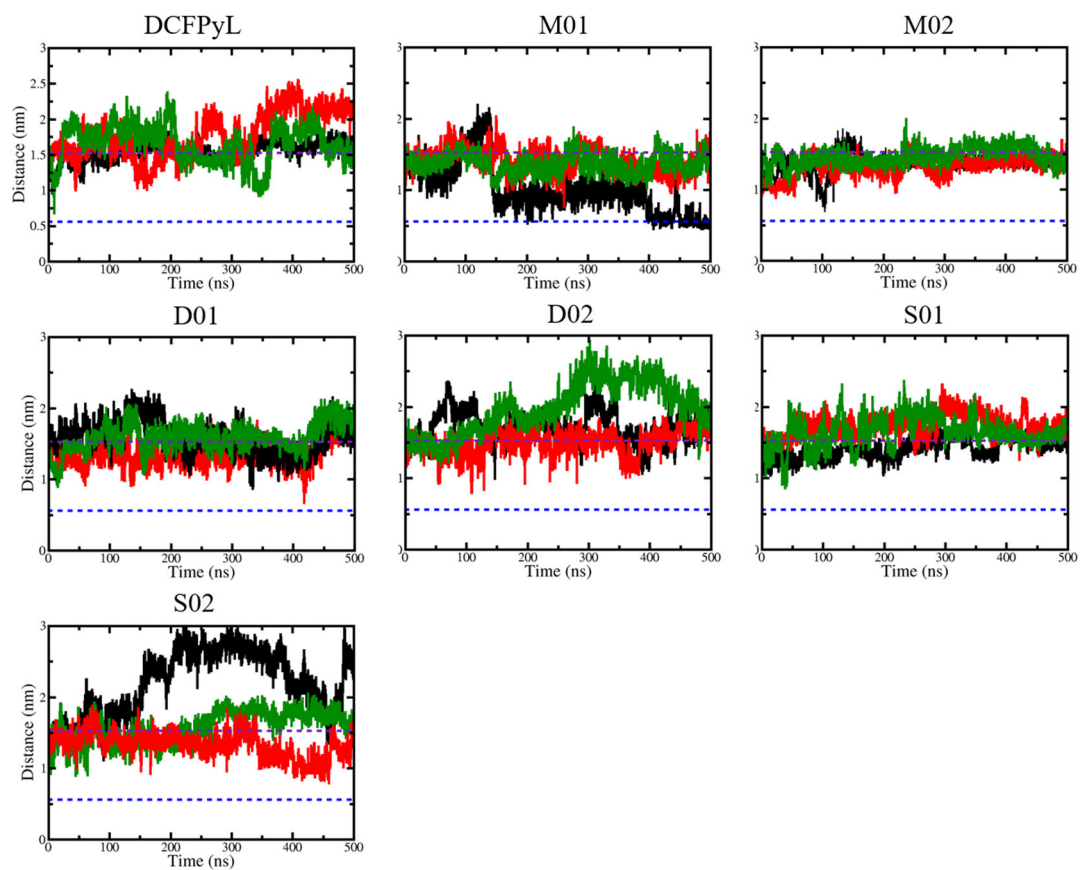

Figure S13. The evolutions of the distance between center of mass of Phe546 and Tyr700 along the simulation time. Different trajectories are represented by distinct colors. The distances in the open and closed states from the crystal structures are shown in black and blue dashed lines.

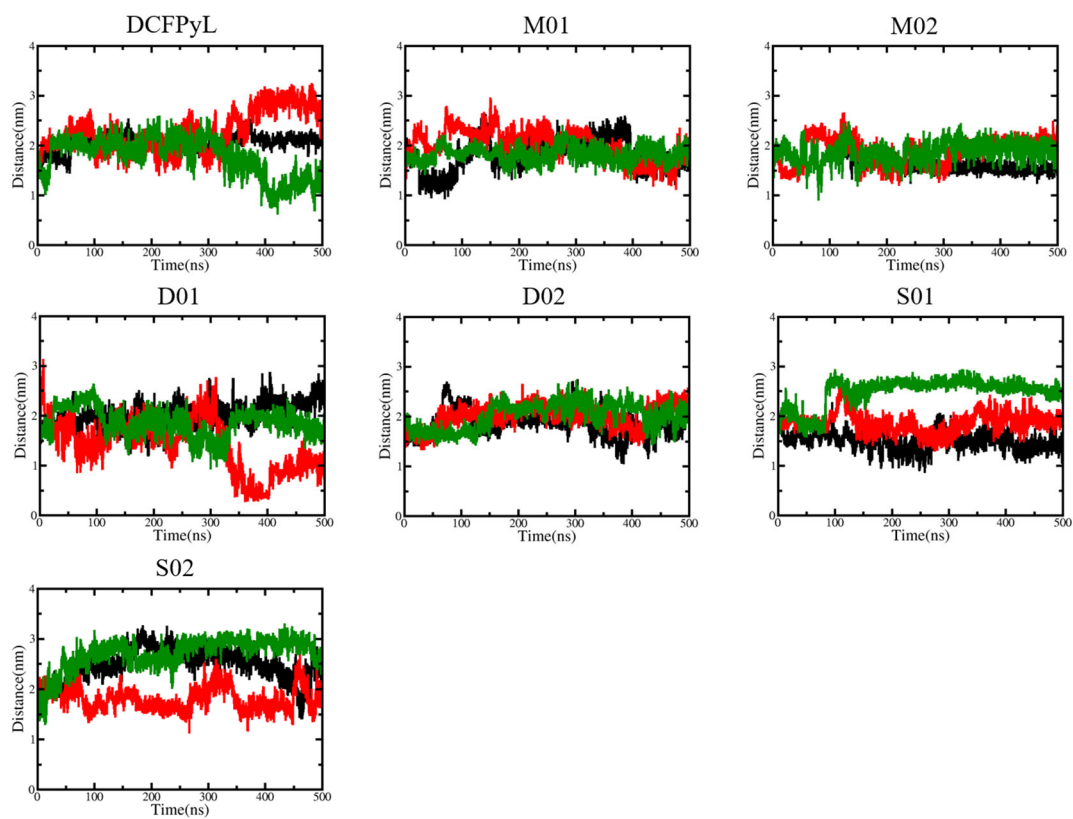

Figure S14. The evolutions of the minimum distances between the Interface Loop and Lys699 and Tyr700 in S1' pocket along the simulation time. Different trajectories are represented by distinct colors.

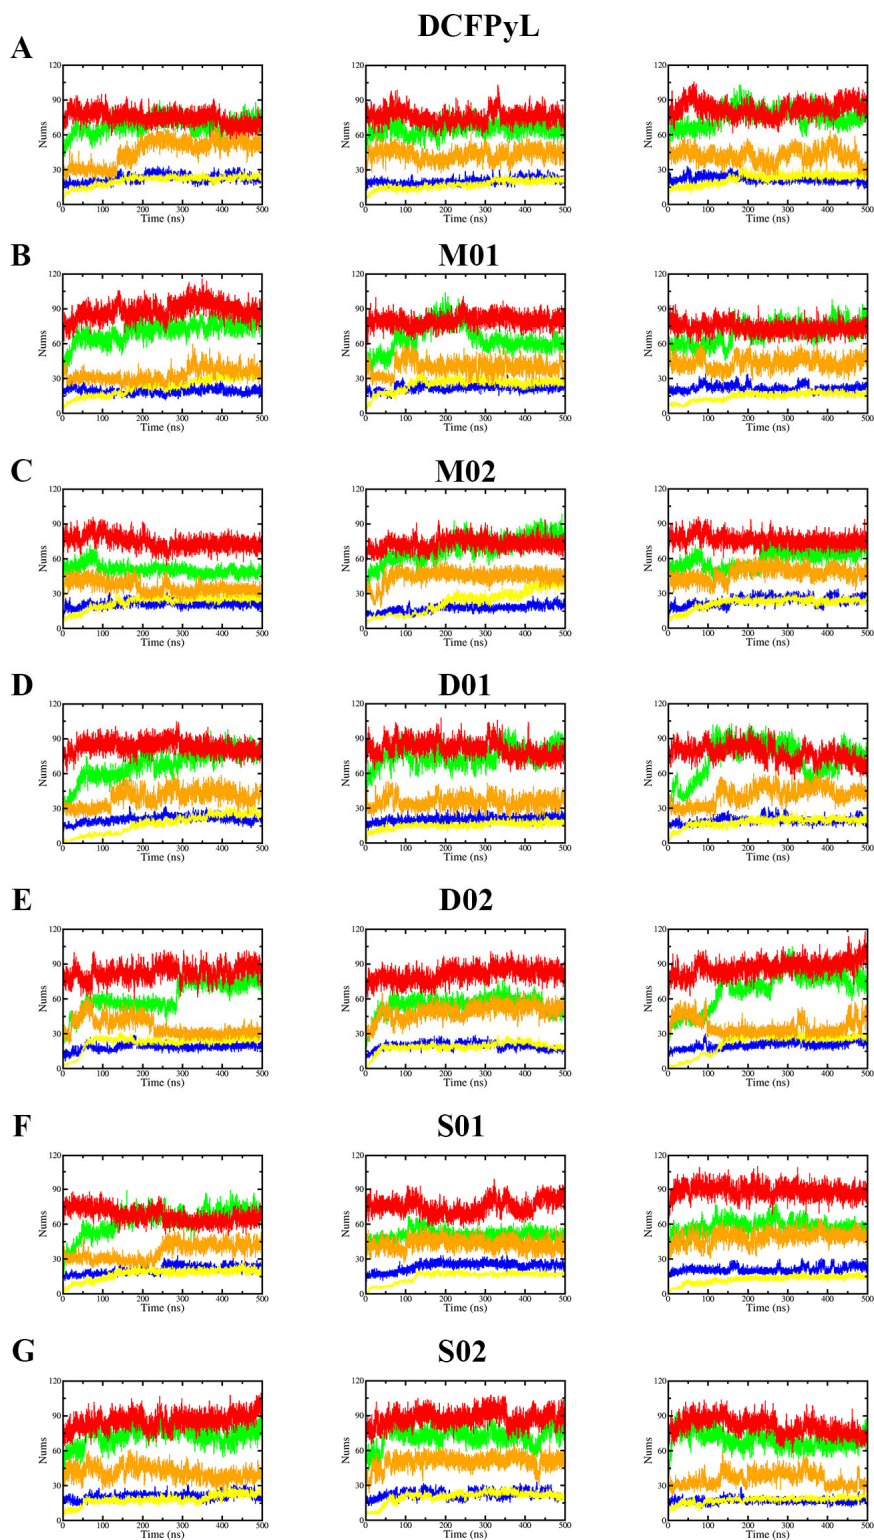

Figure S15. The variations in the number of water molecules within 0.35 nm of the structural elements of the binding pockets in the holo-monomer along the simulation times. Each column corresponds to a parallel trajectory. The S1' pockets are denoted in green, the Arg Patch in blue, the ZBG in yellow, the Arene-Binding Site (ABS) in orange, and the Entrance Lid, in red.

Table S3. The average ( $\pm$ variance) of the number of water molecules within 0.35 nm of the structural elements of the binding pockets in the holo-monomer.

|        | <b>S1'</b>     | <b>Arg Patch</b> | <b>ZBG</b>    | <b>ABS</b>    | <b>Entrance Lid</b> |
|--------|----------------|------------------|---------------|---------------|---------------------|
| DCFPyL | 69 ( $\pm$ 8)  | 21 ( $\pm$ 3)    | 20 ( $\pm$ 5) | 43 ( $\pm$ 8) | 77 ( $\pm$ 7)       |
| M01    | 67 ( $\pm$ 10) | 20 ( $\pm$ 3)    | 20 ( $\pm$ 7) | 38 ( $\pm$ 7) | 80 ( $\pm$ 8)       |
| M02    | 59 ( $\pm$ 11) | 20 ( $\pm$ 4)    | 22 ( $\pm$ 7) | 42 ( $\pm$ 8) | 75 ( $\pm$ 6)       |
| D01    | 71 ( $\pm$ 13) | 20 ( $\pm$ 3)    | 16 ( $\pm$ 6) | 38 ( $\pm$ 7) | 80 ( $\pm$ 7)       |
| D02    | 61 ( $\pm$ 14) | 19 ( $\pm$ 3)    | 21 ( $\pm$ 7) | 40 ( $\pm$ 9) | 83 ( $\pm$ 7)       |
| S01    | 57 ( $\pm$ 9)  | 21 ( $\pm$ 4)    | 15 ( $\pm$ 5) | 42 ( $\pm$ 8) | 77 ( $\pm$ 11)      |
| S02    | 71 ( $\pm$ 8)  | 19 ( $\pm$ 4)    | 18 ( $\pm$ 4) | 42 ( $\pm$ 8) | 84 ( $\pm$ 8)       |
